# Supplementary material
Source: PubMed Central journal article supplement (PMC193525)

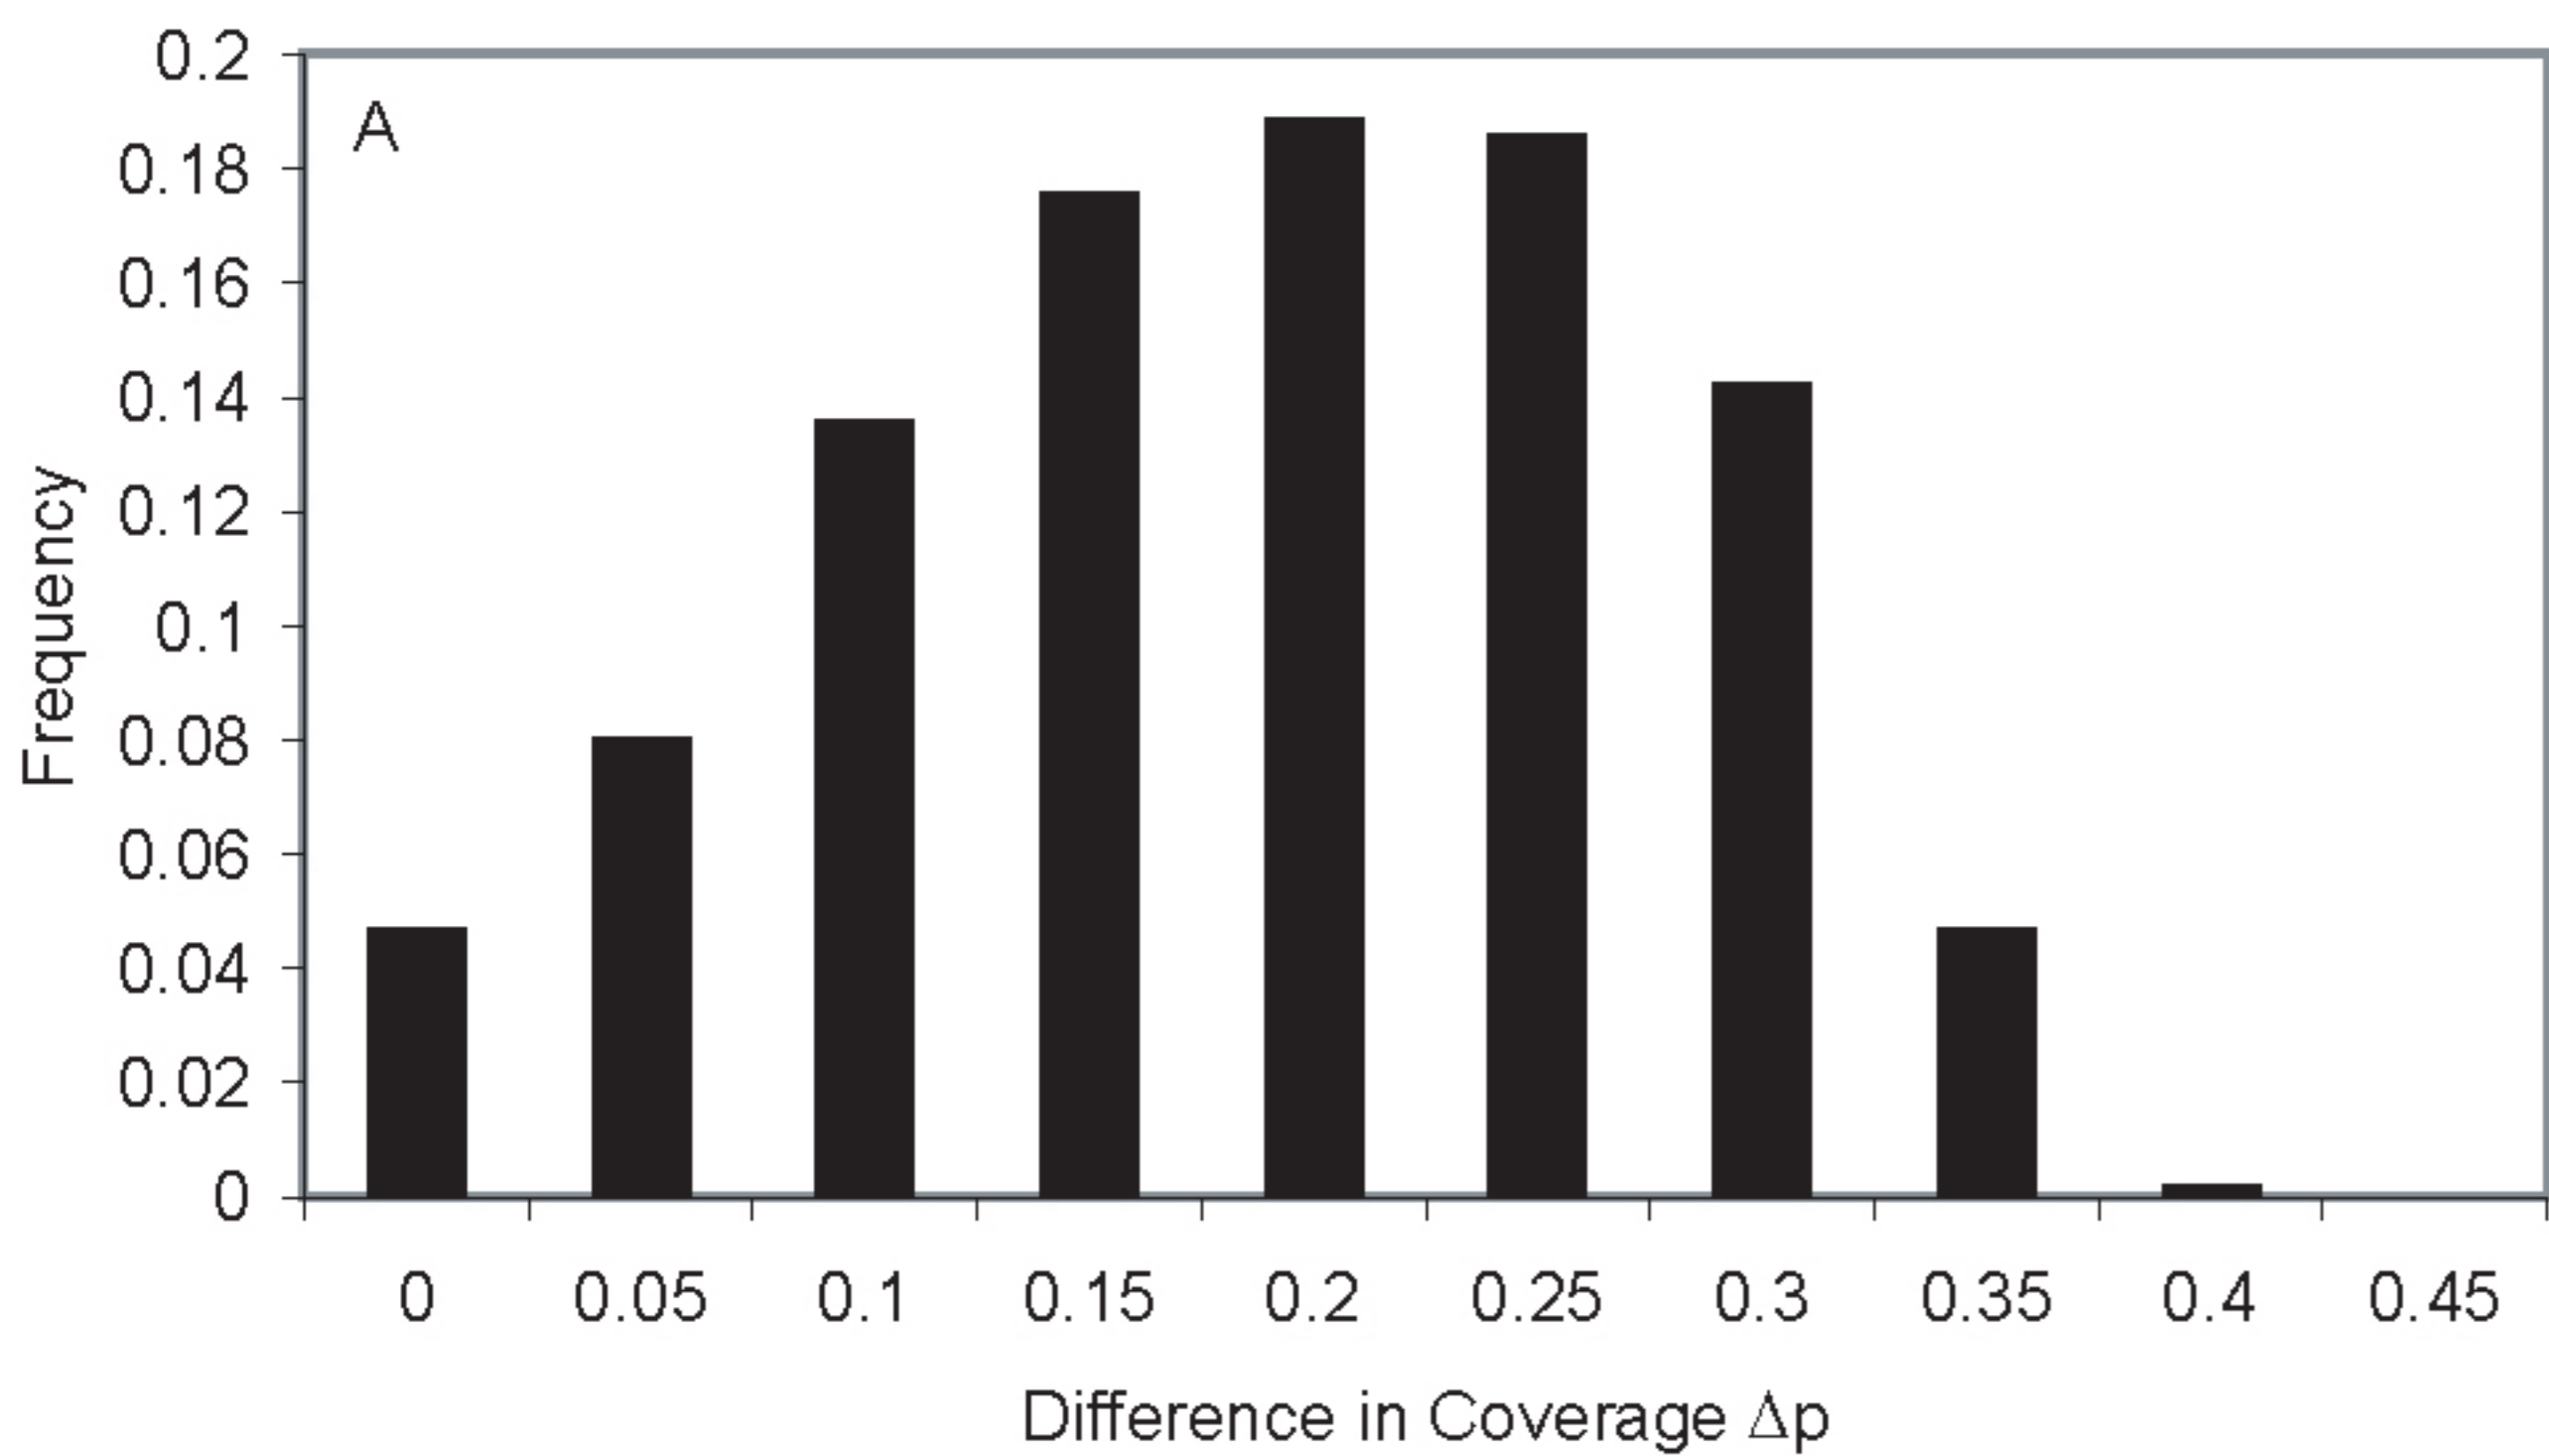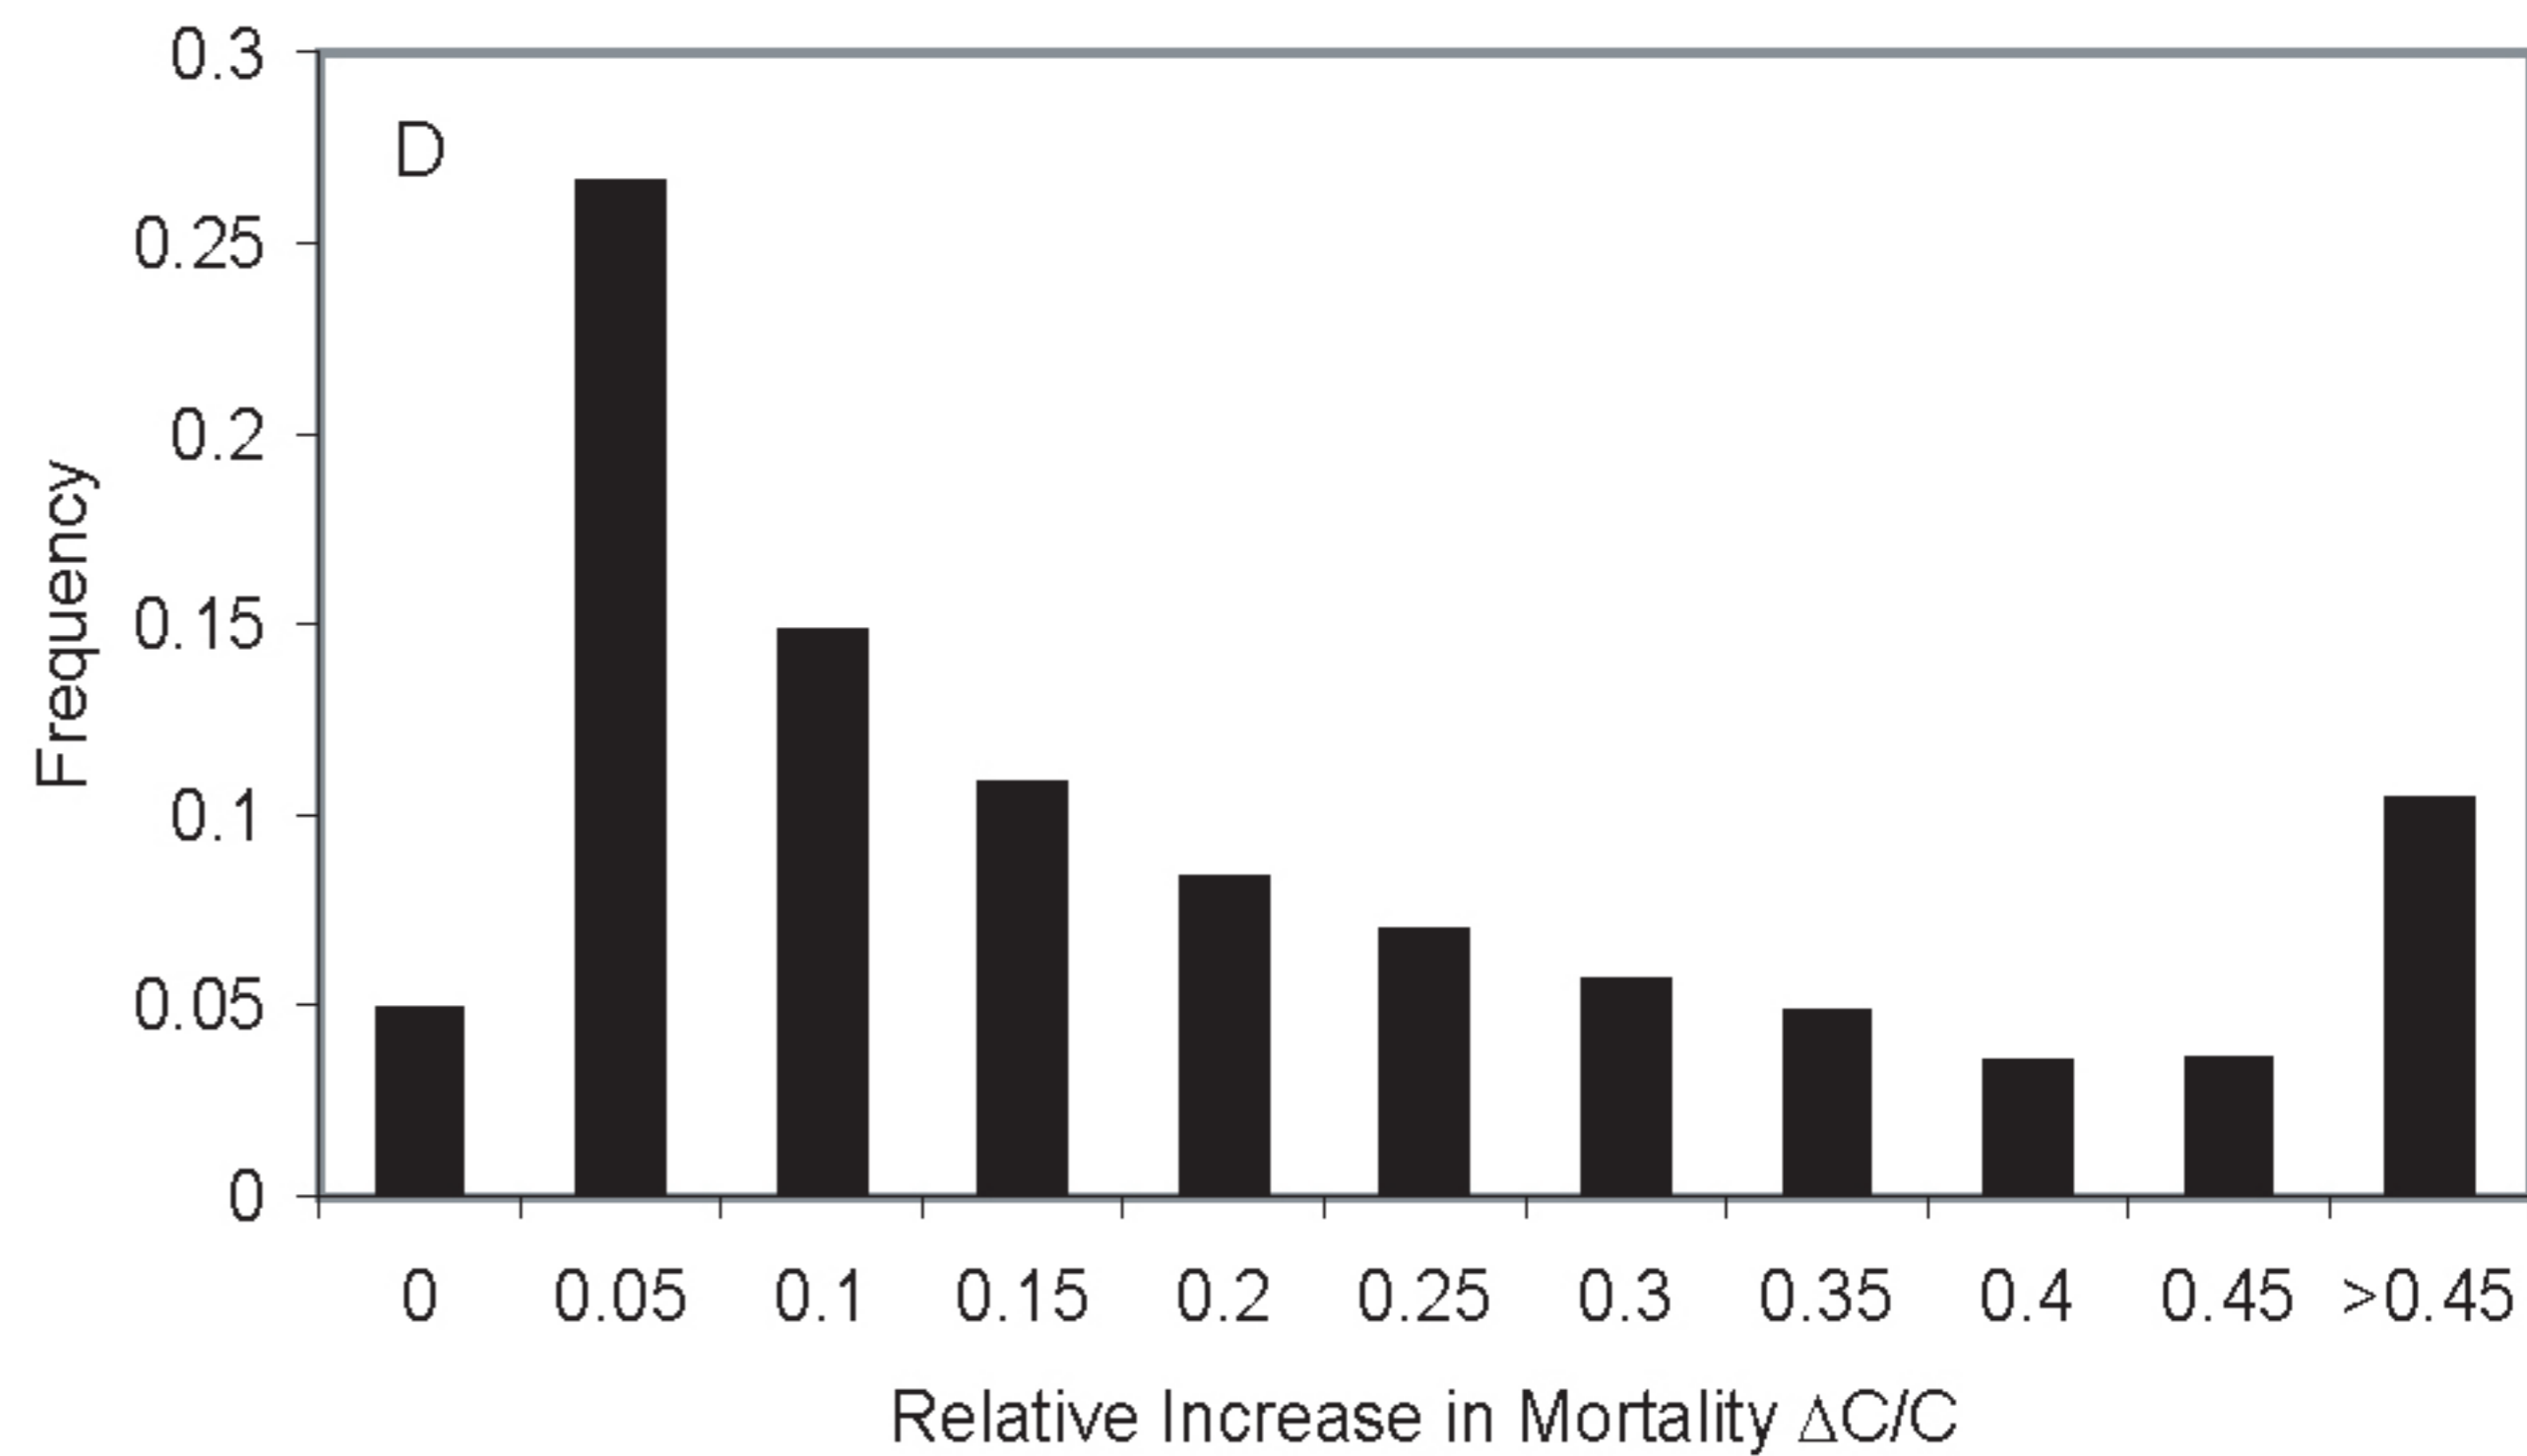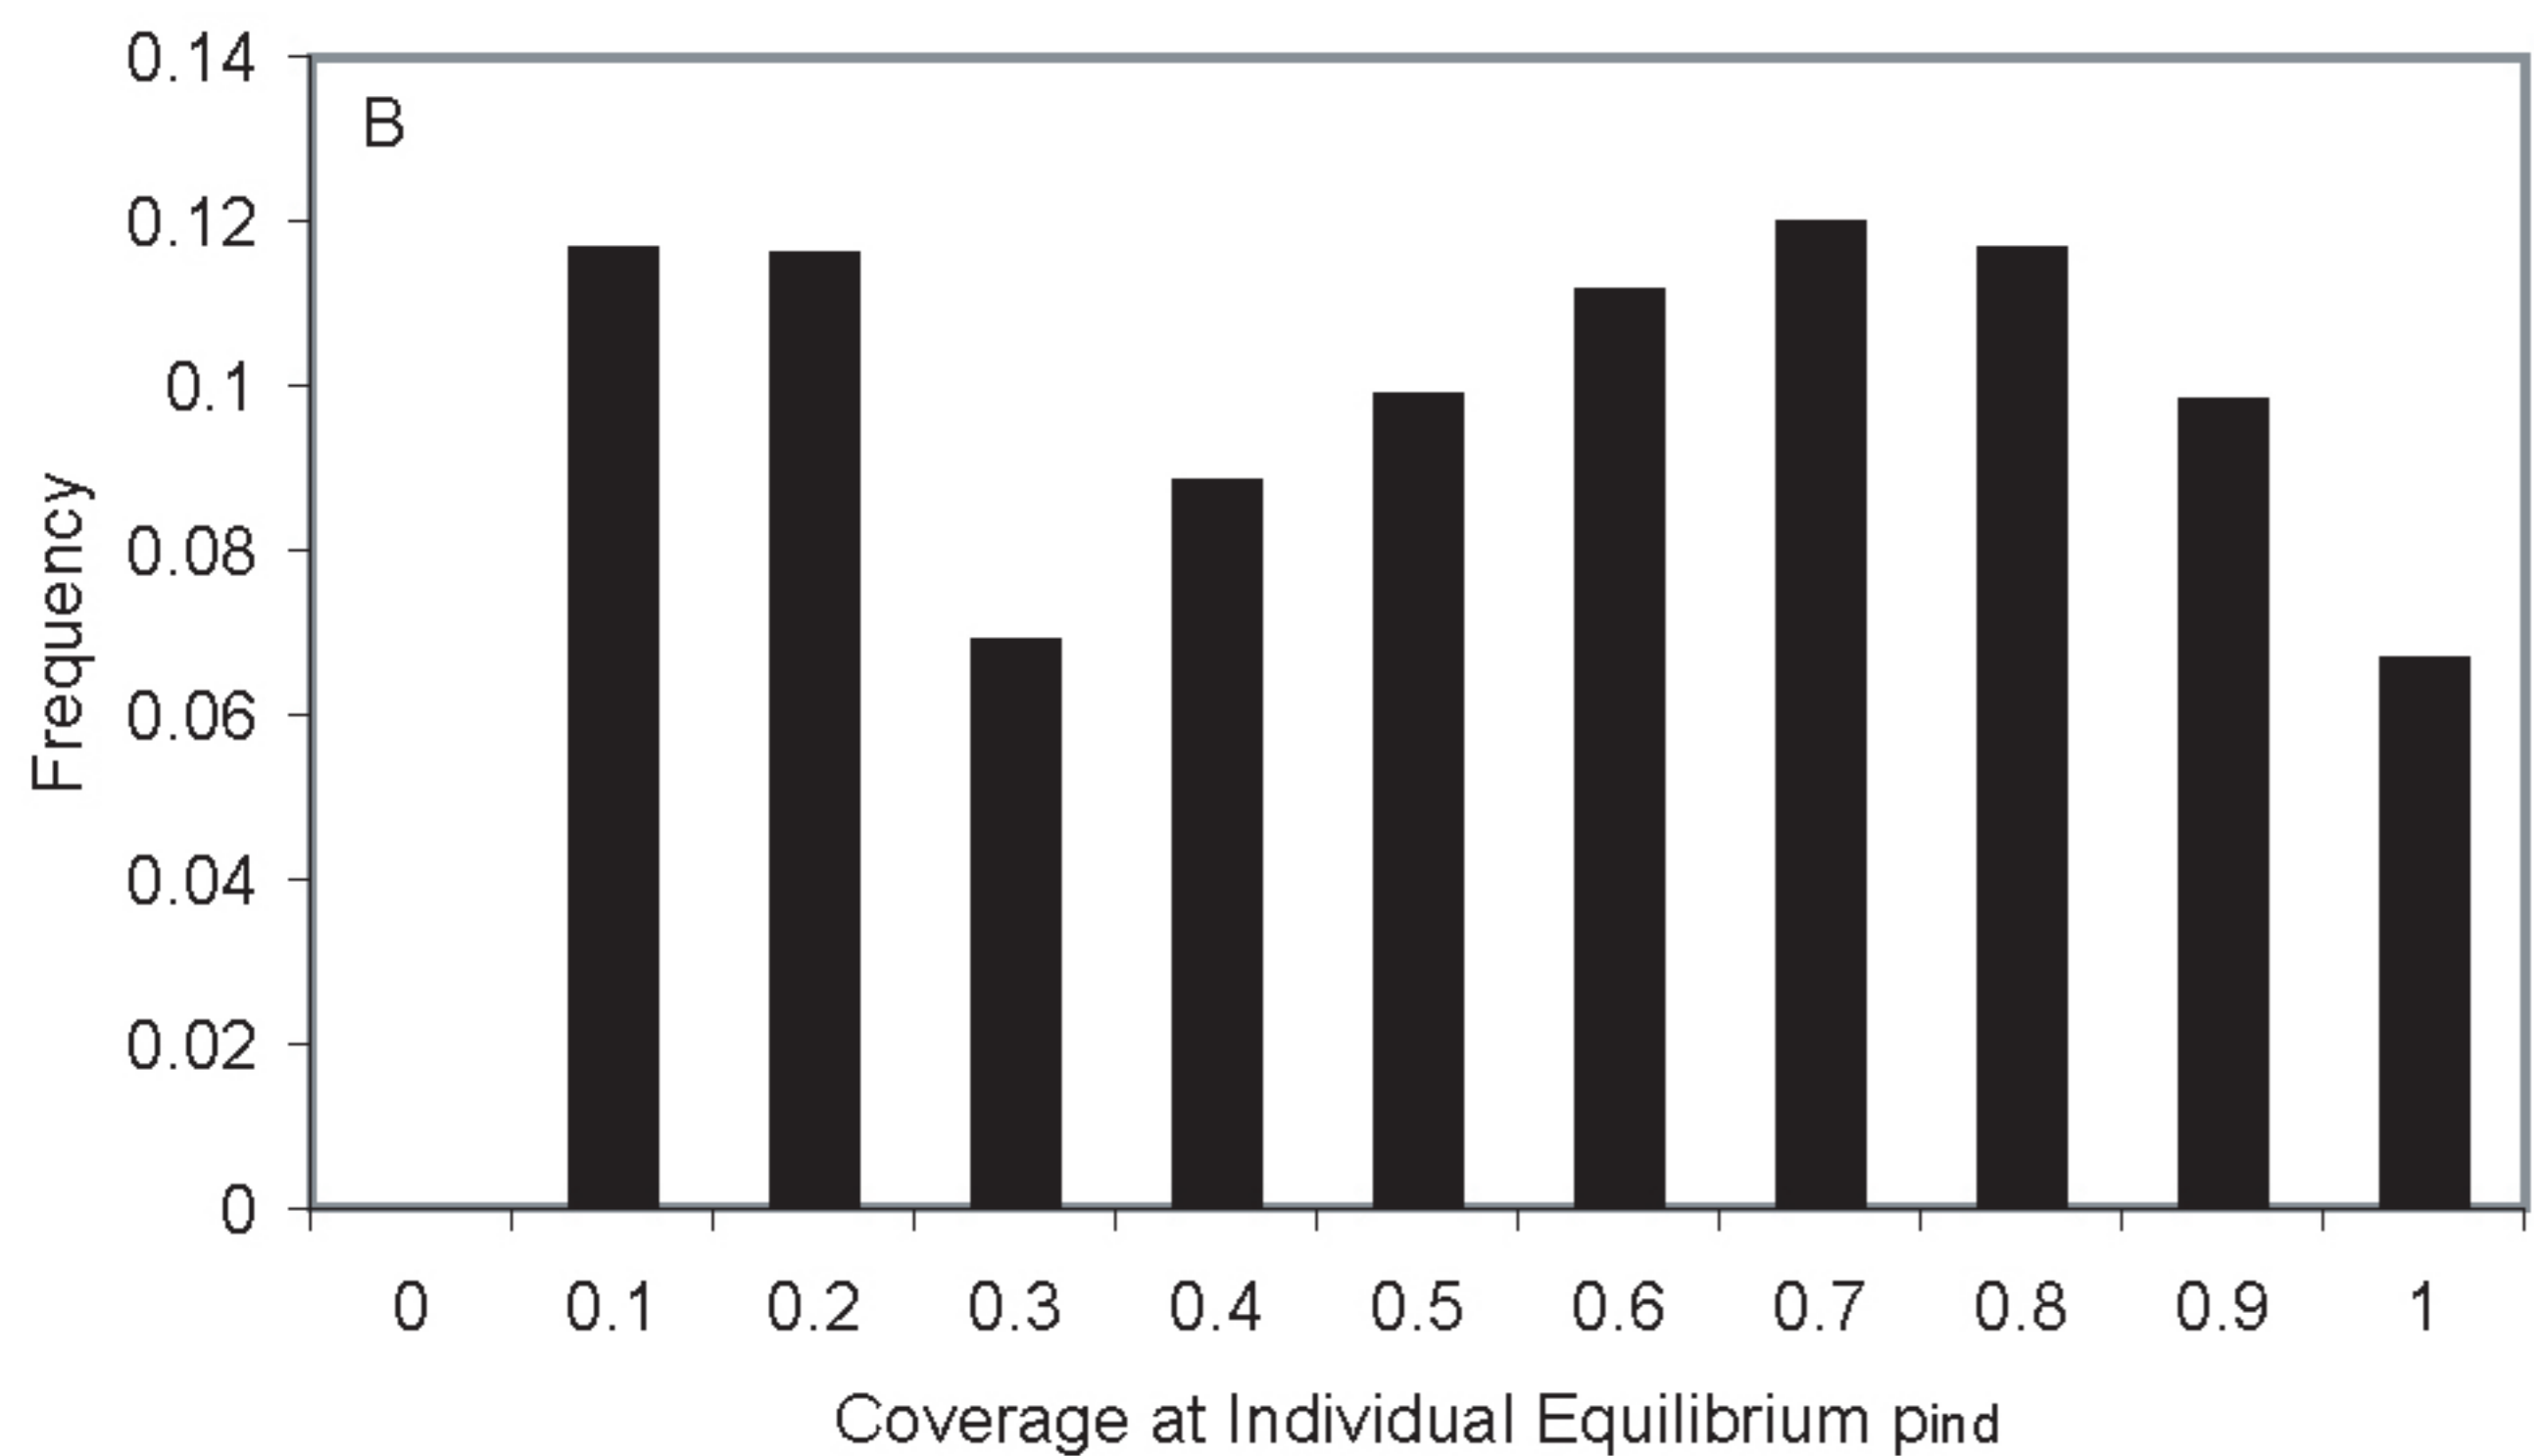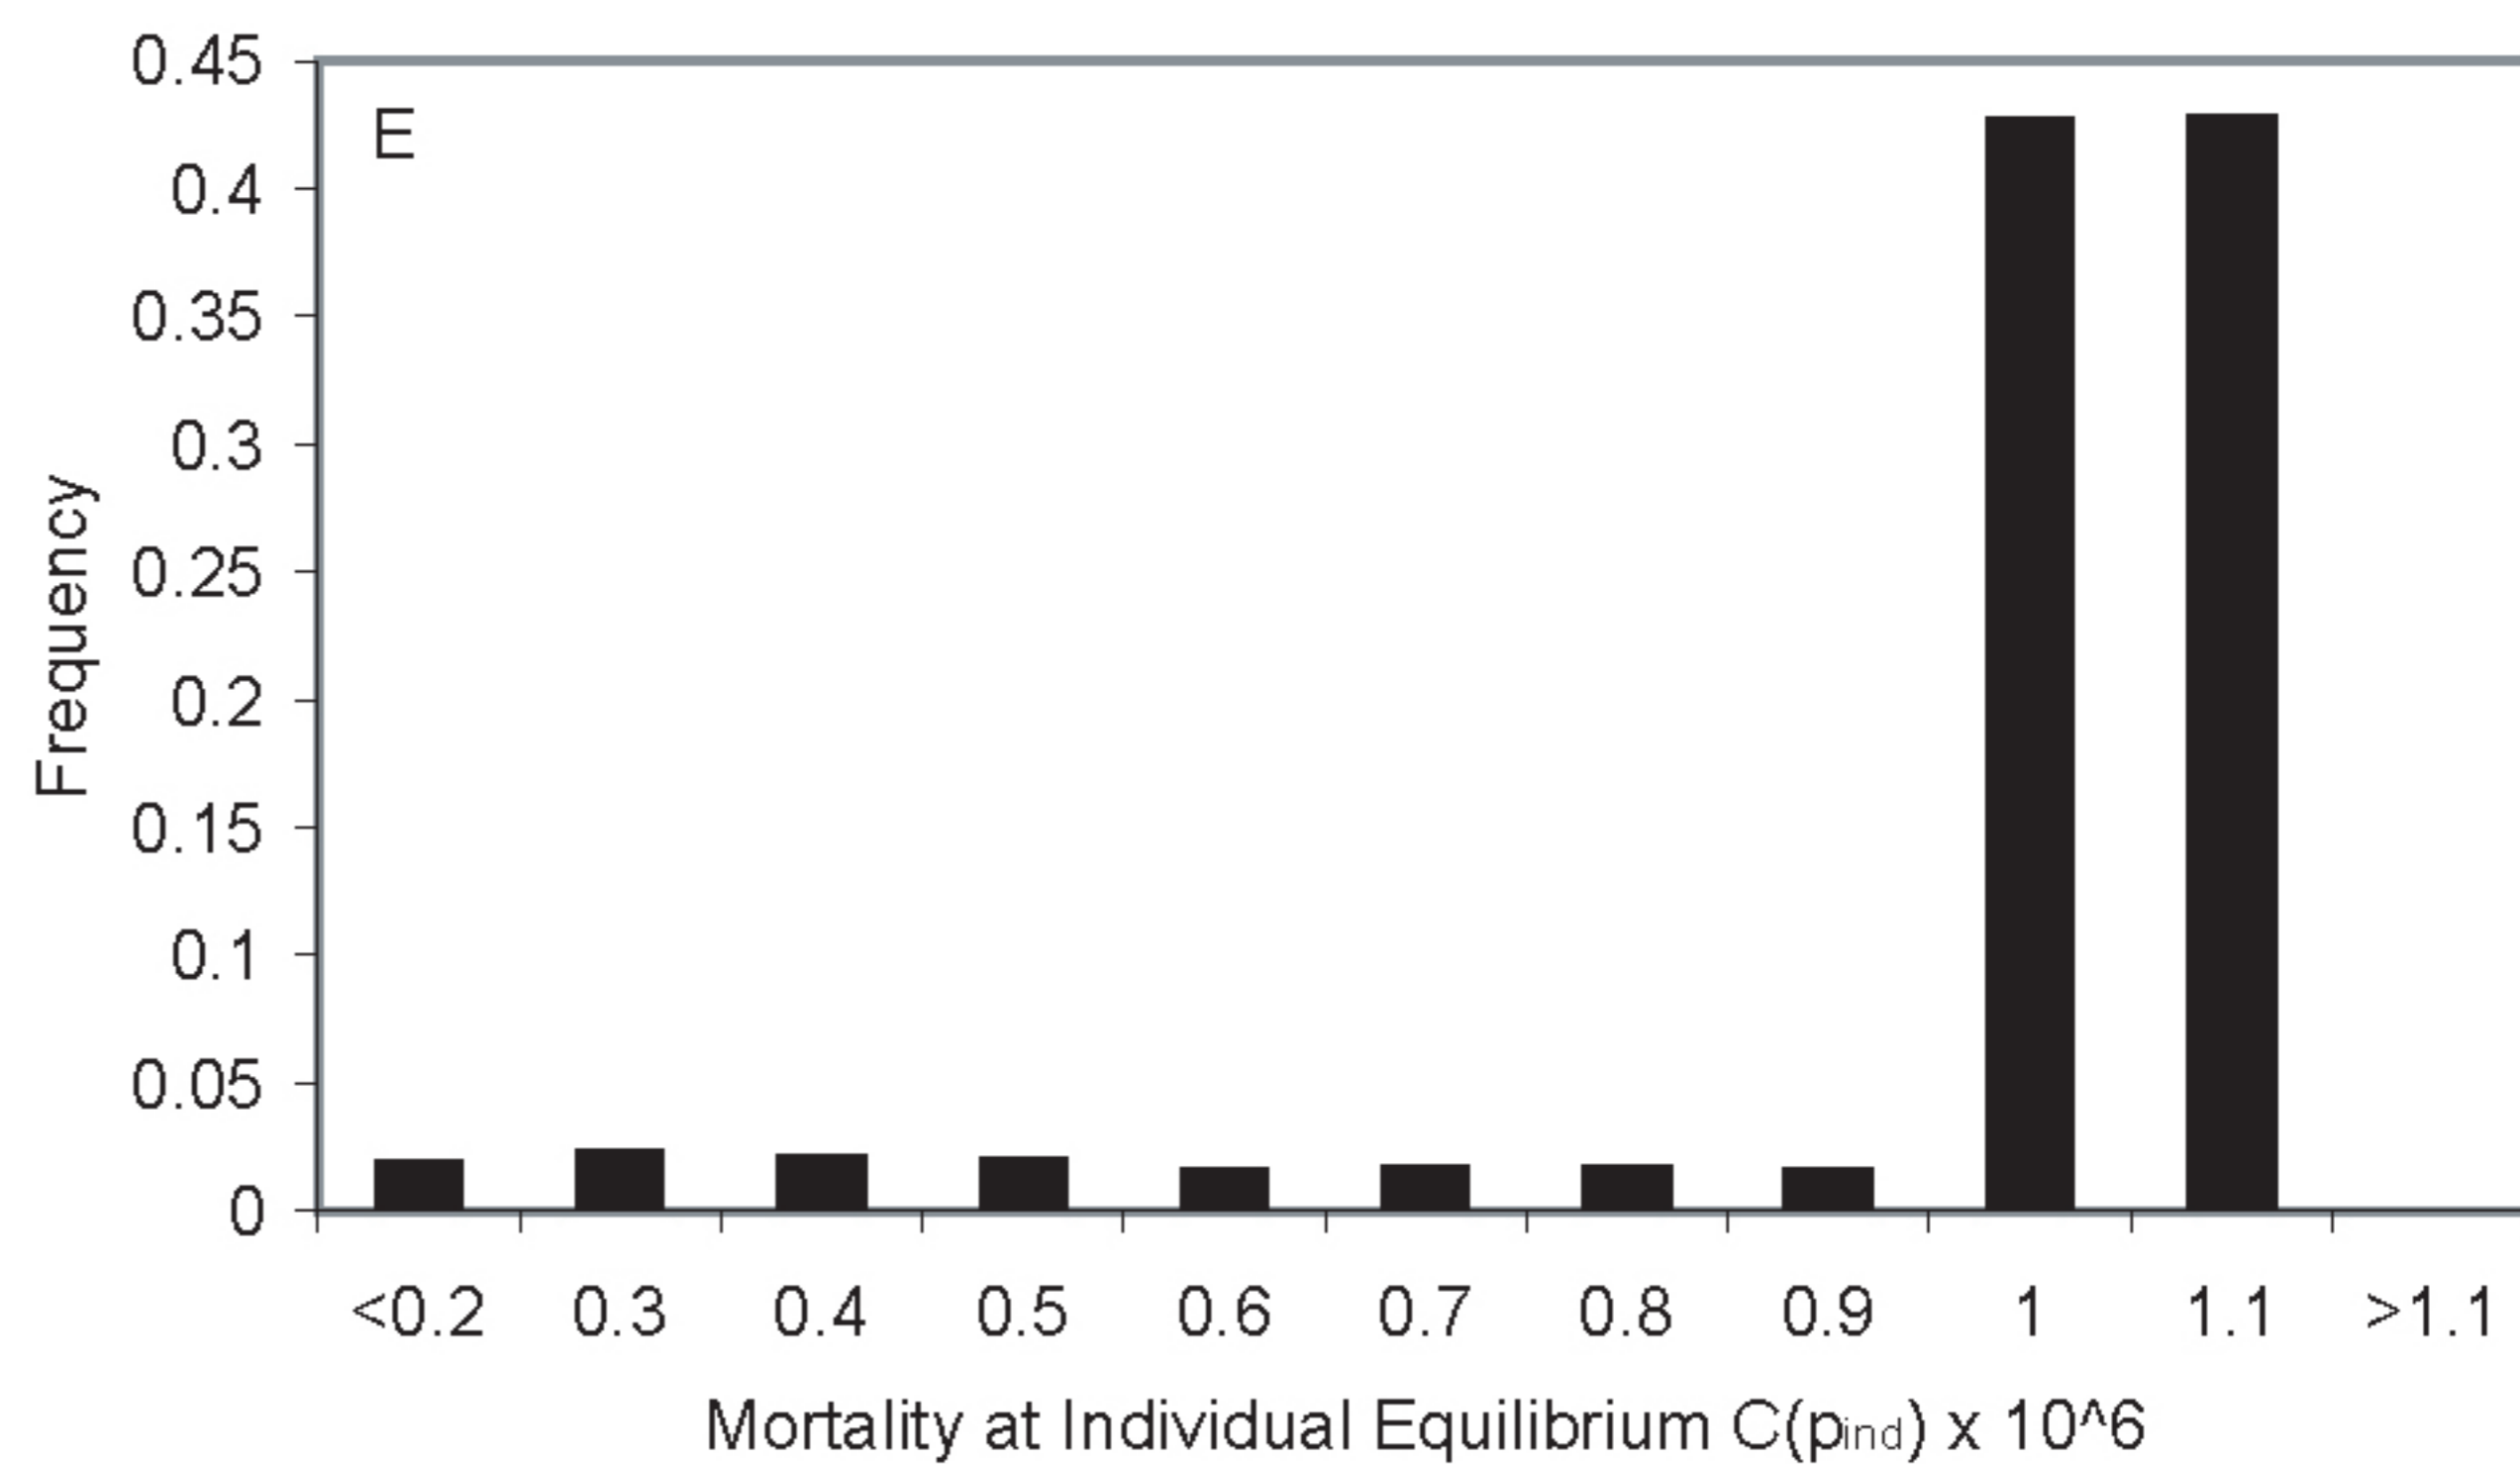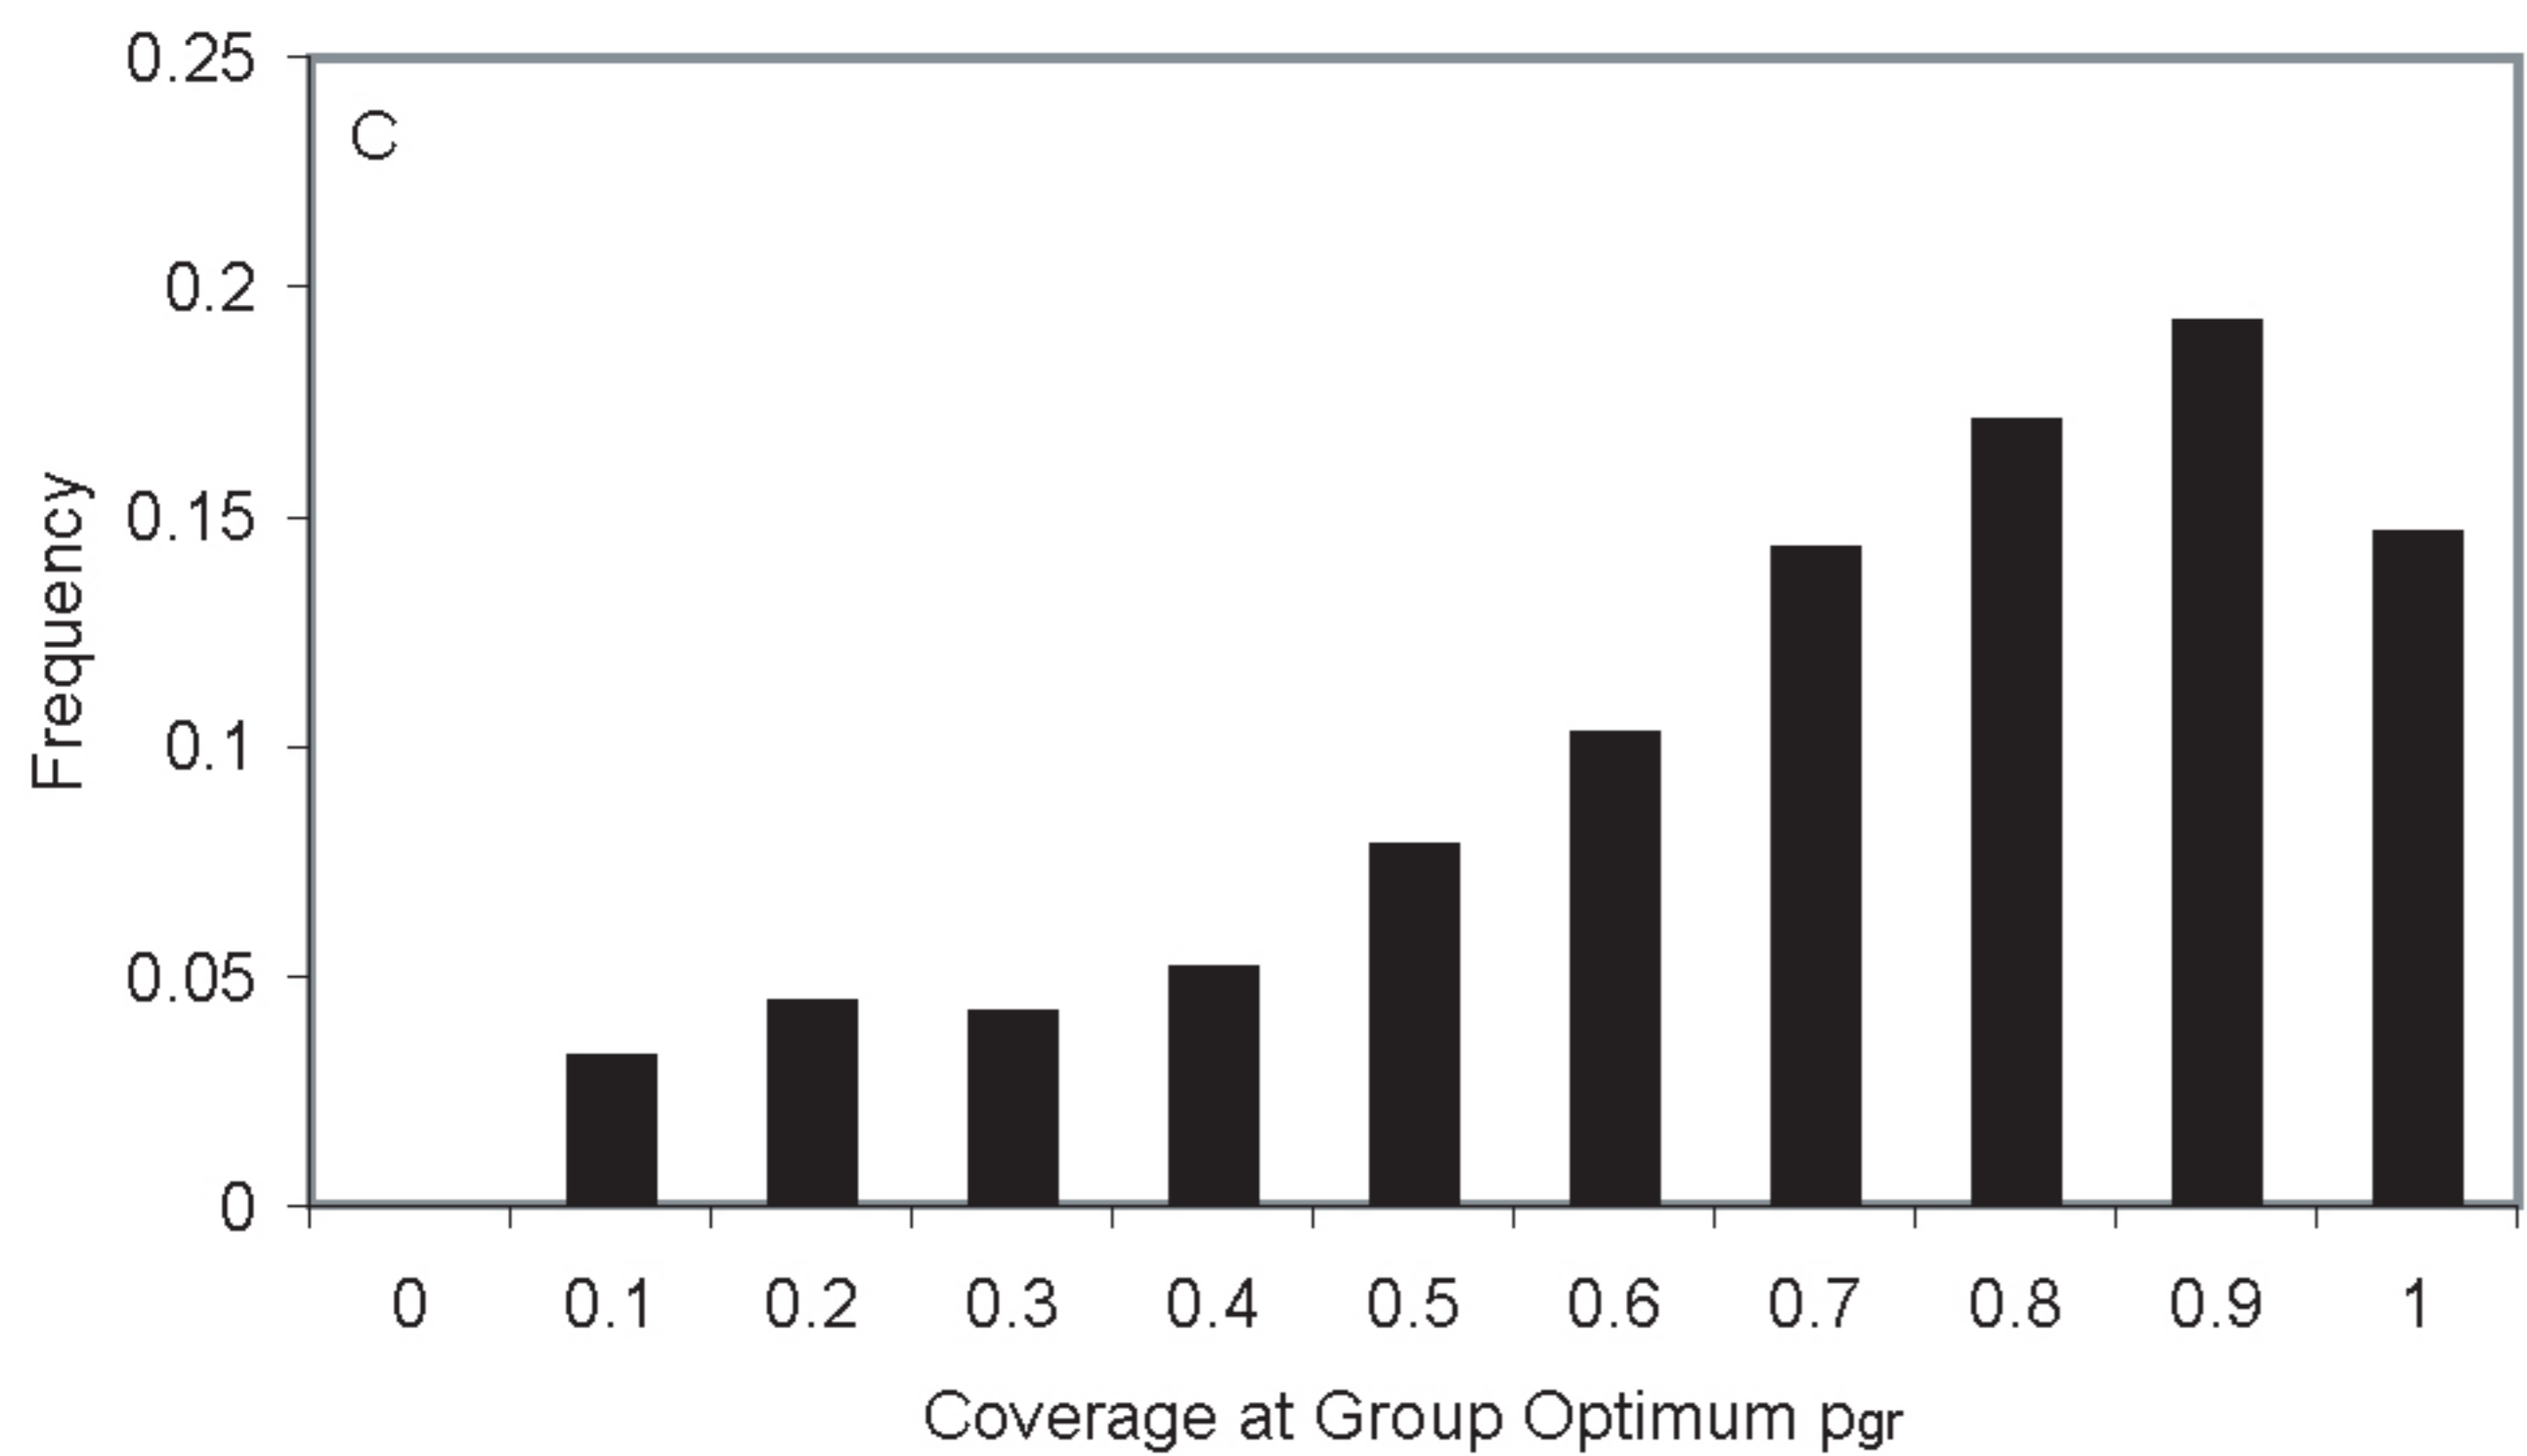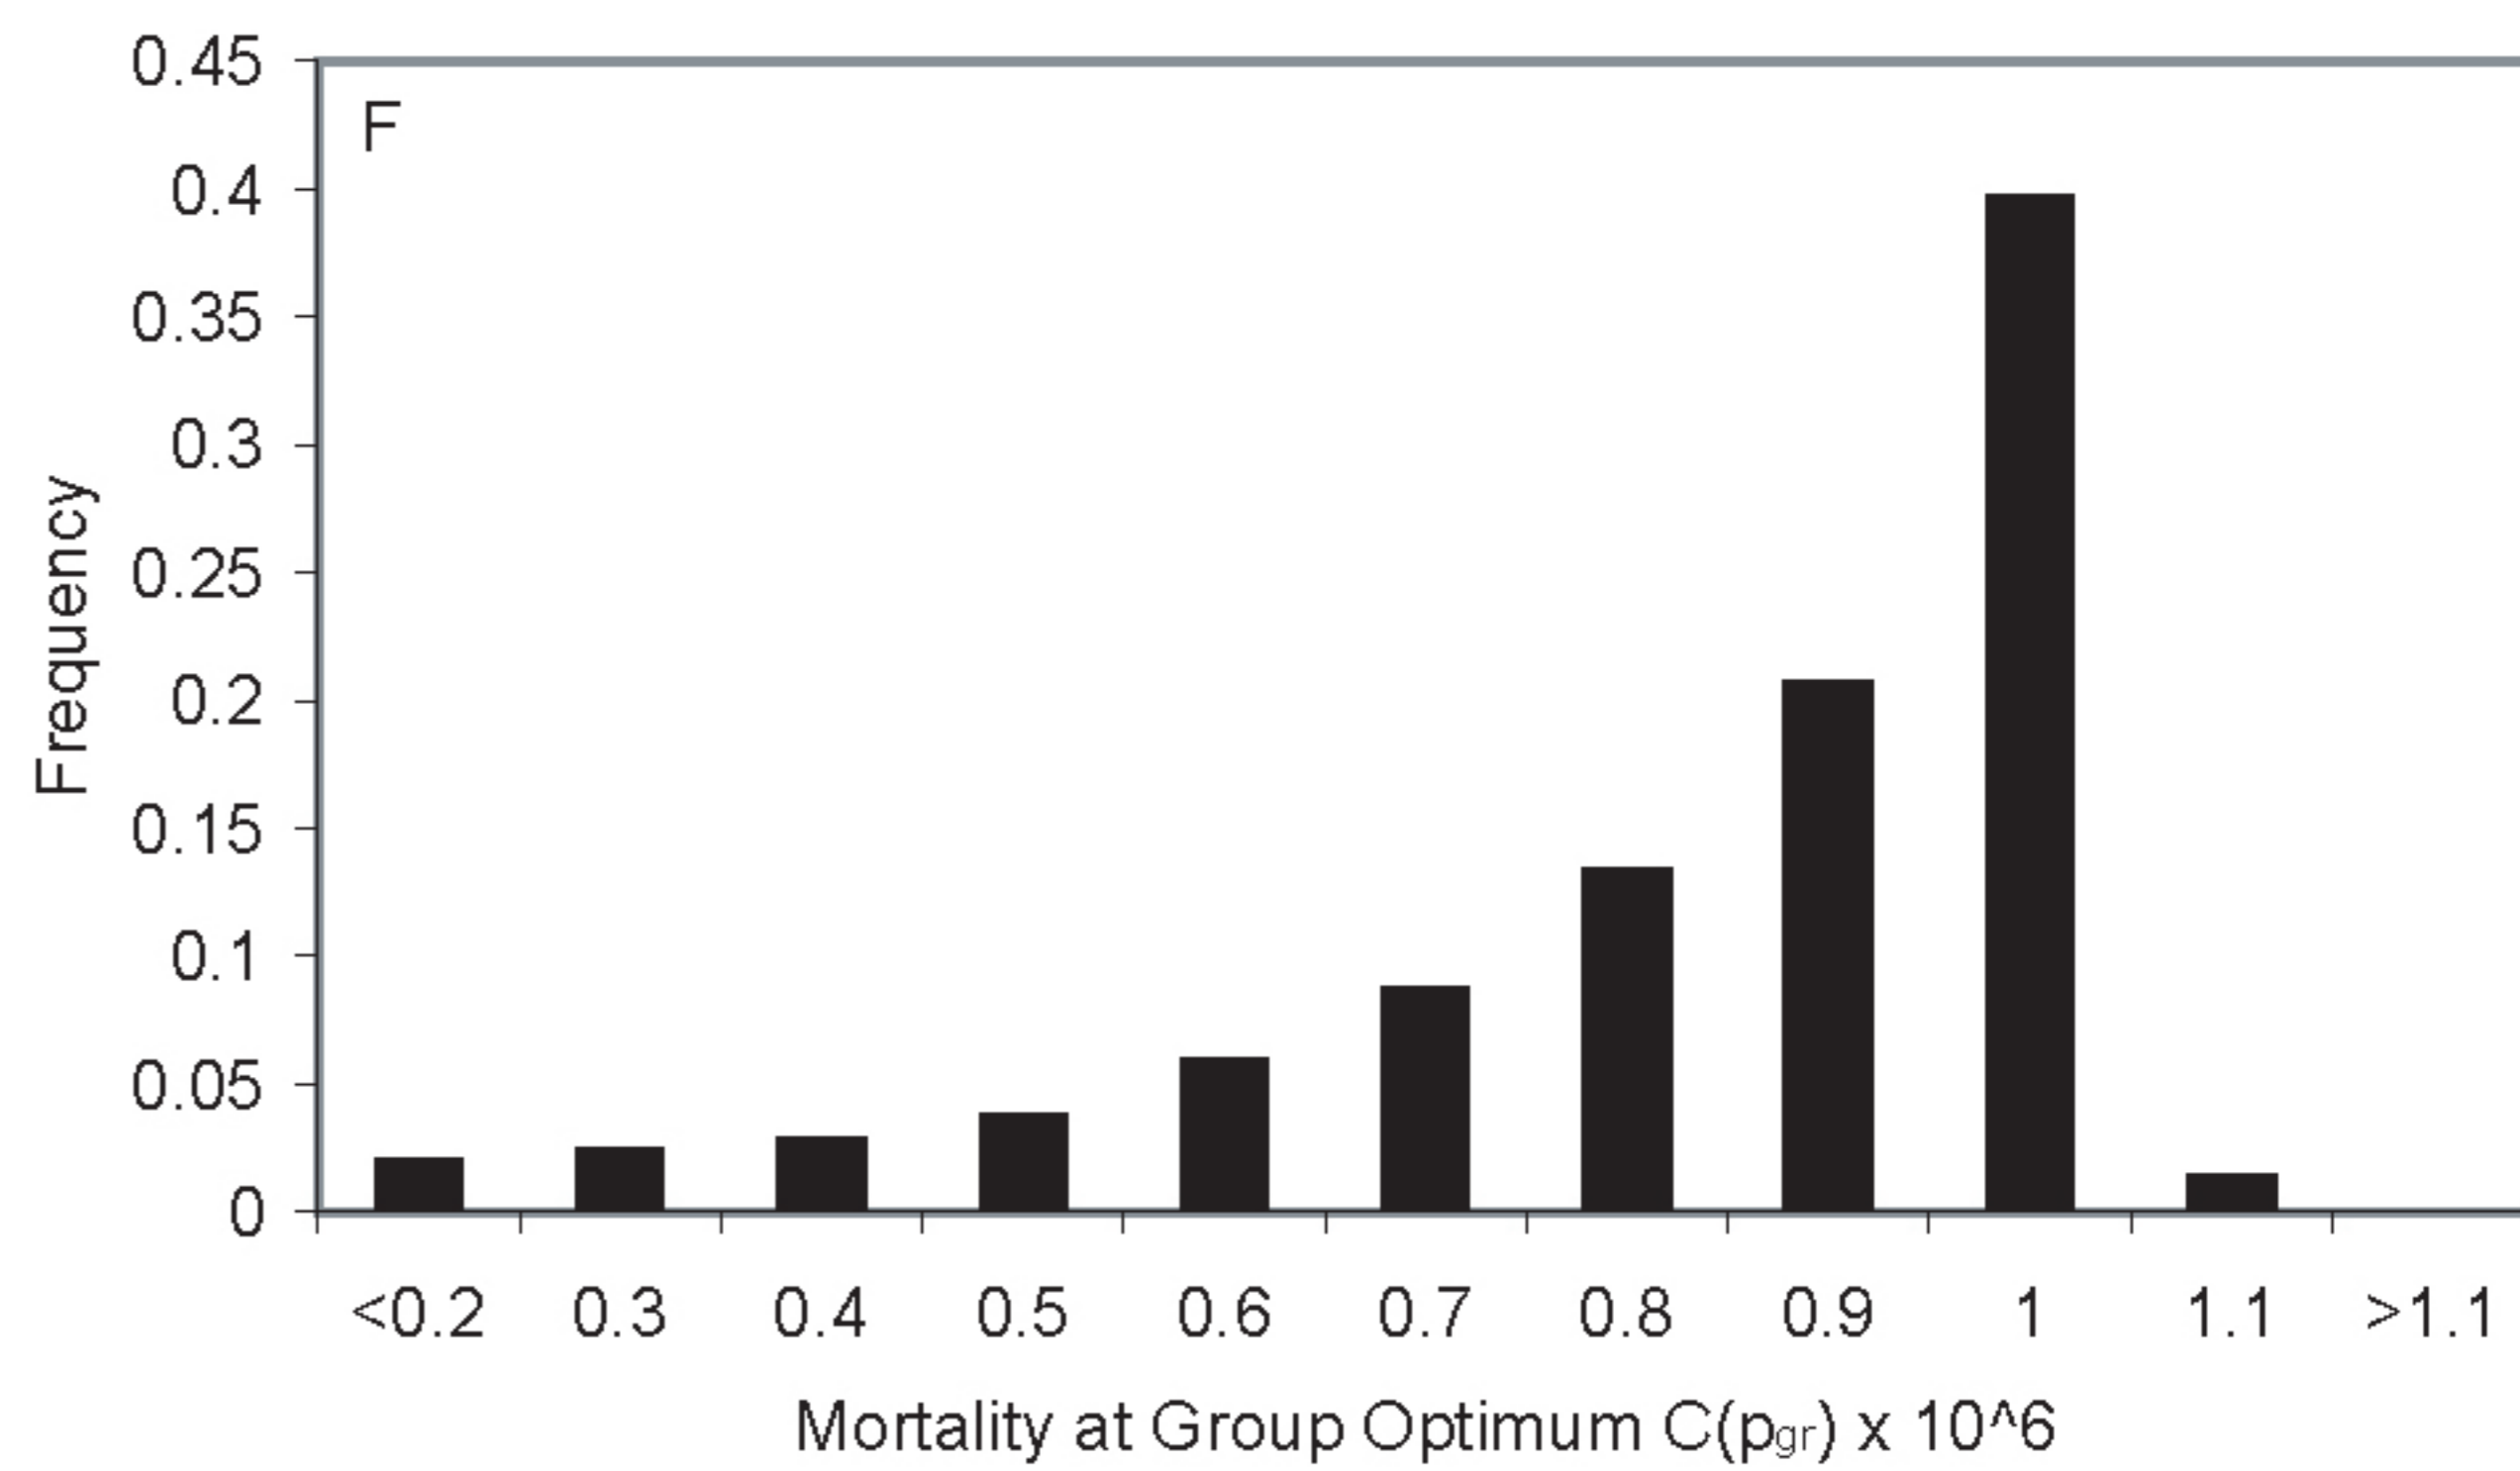

Supplement: pnas_1731324100_3.pdf [file pnas_1731324100_3.pdf]

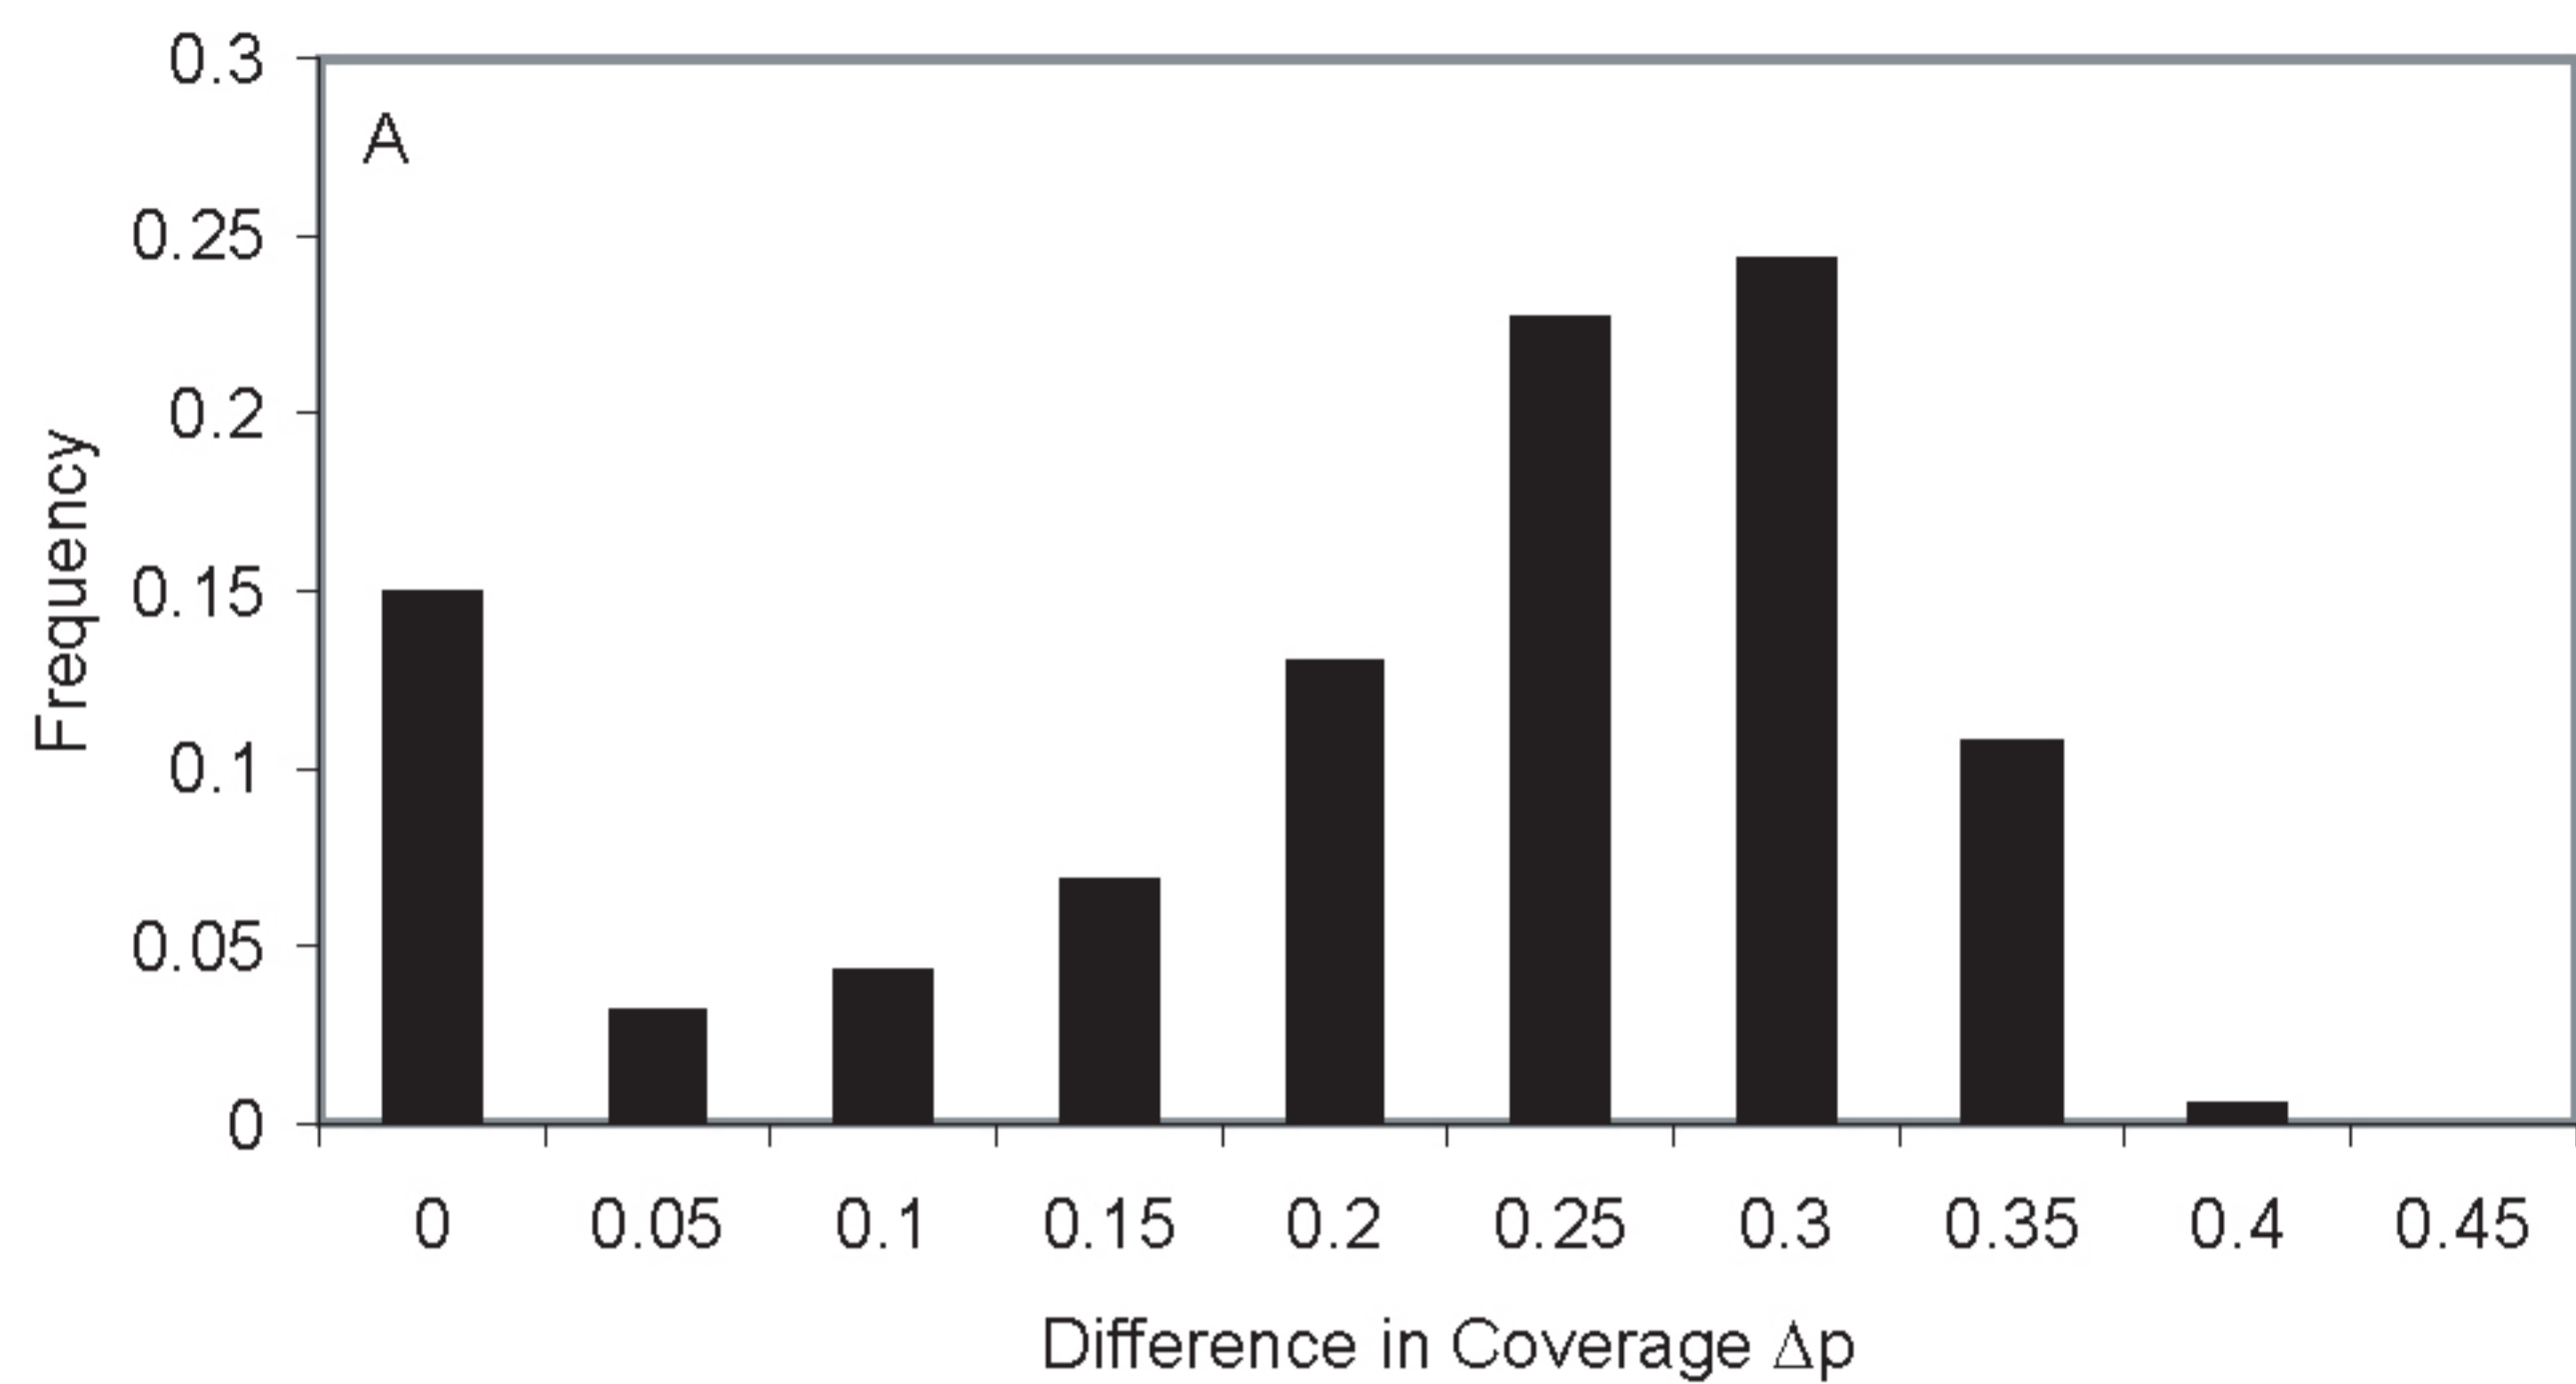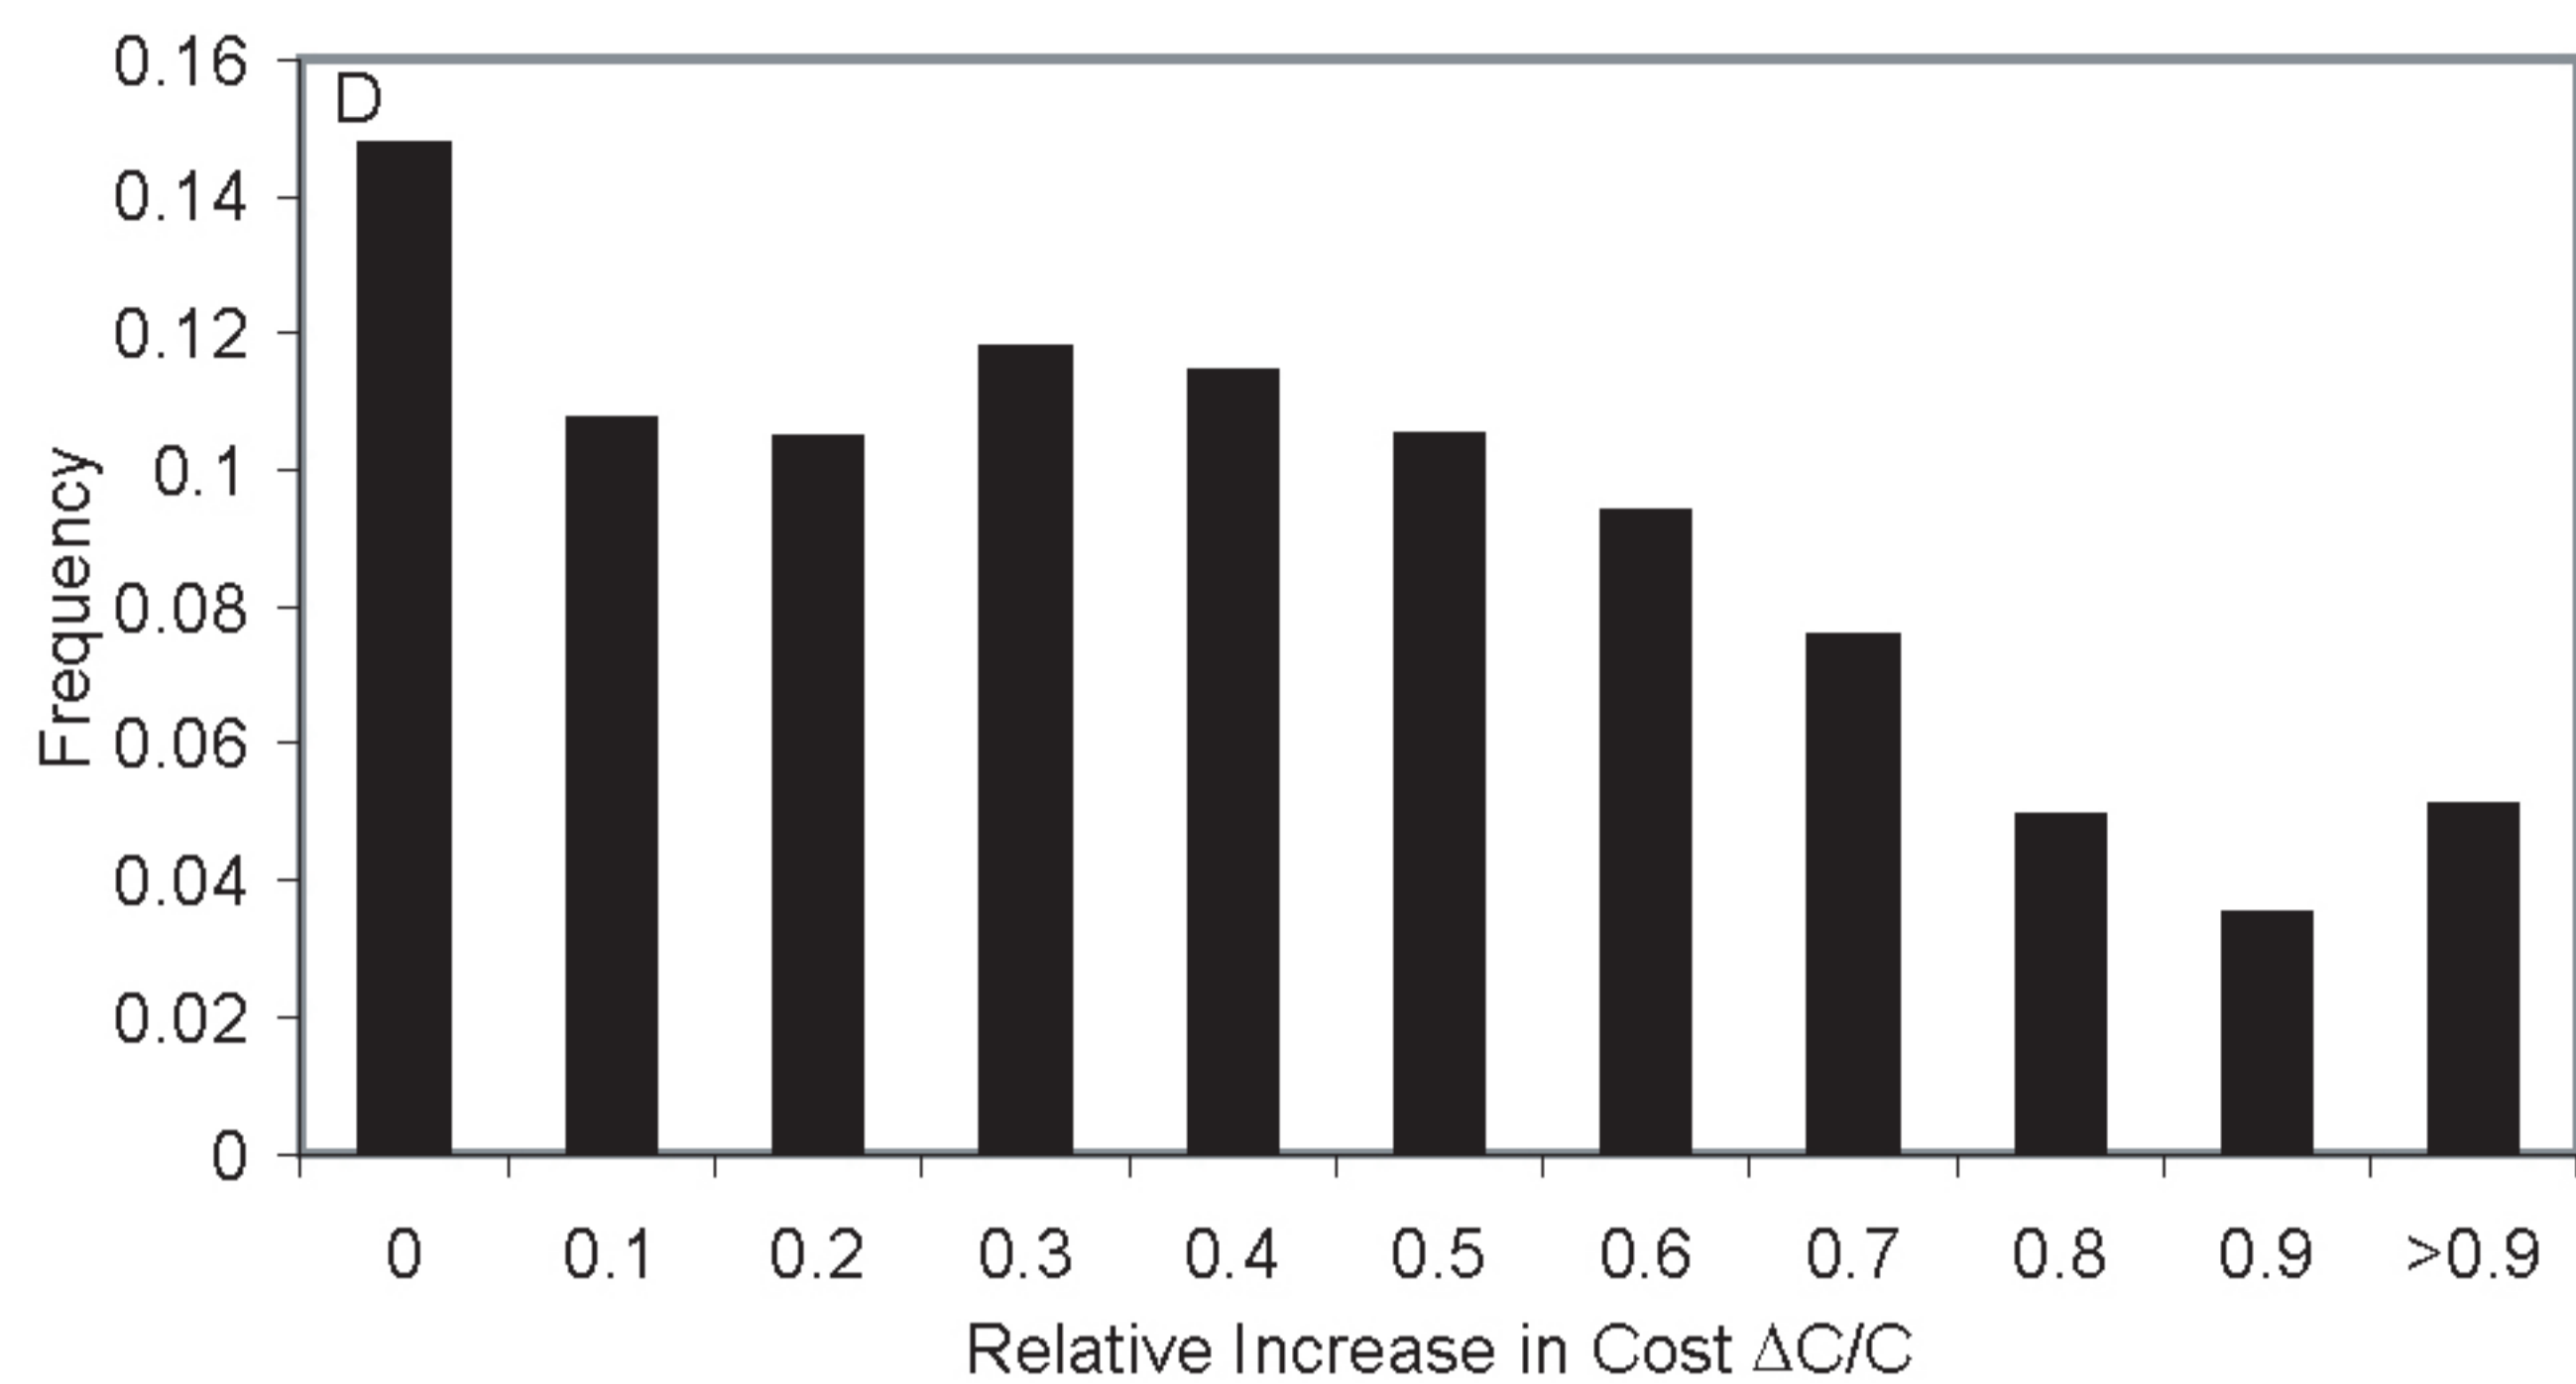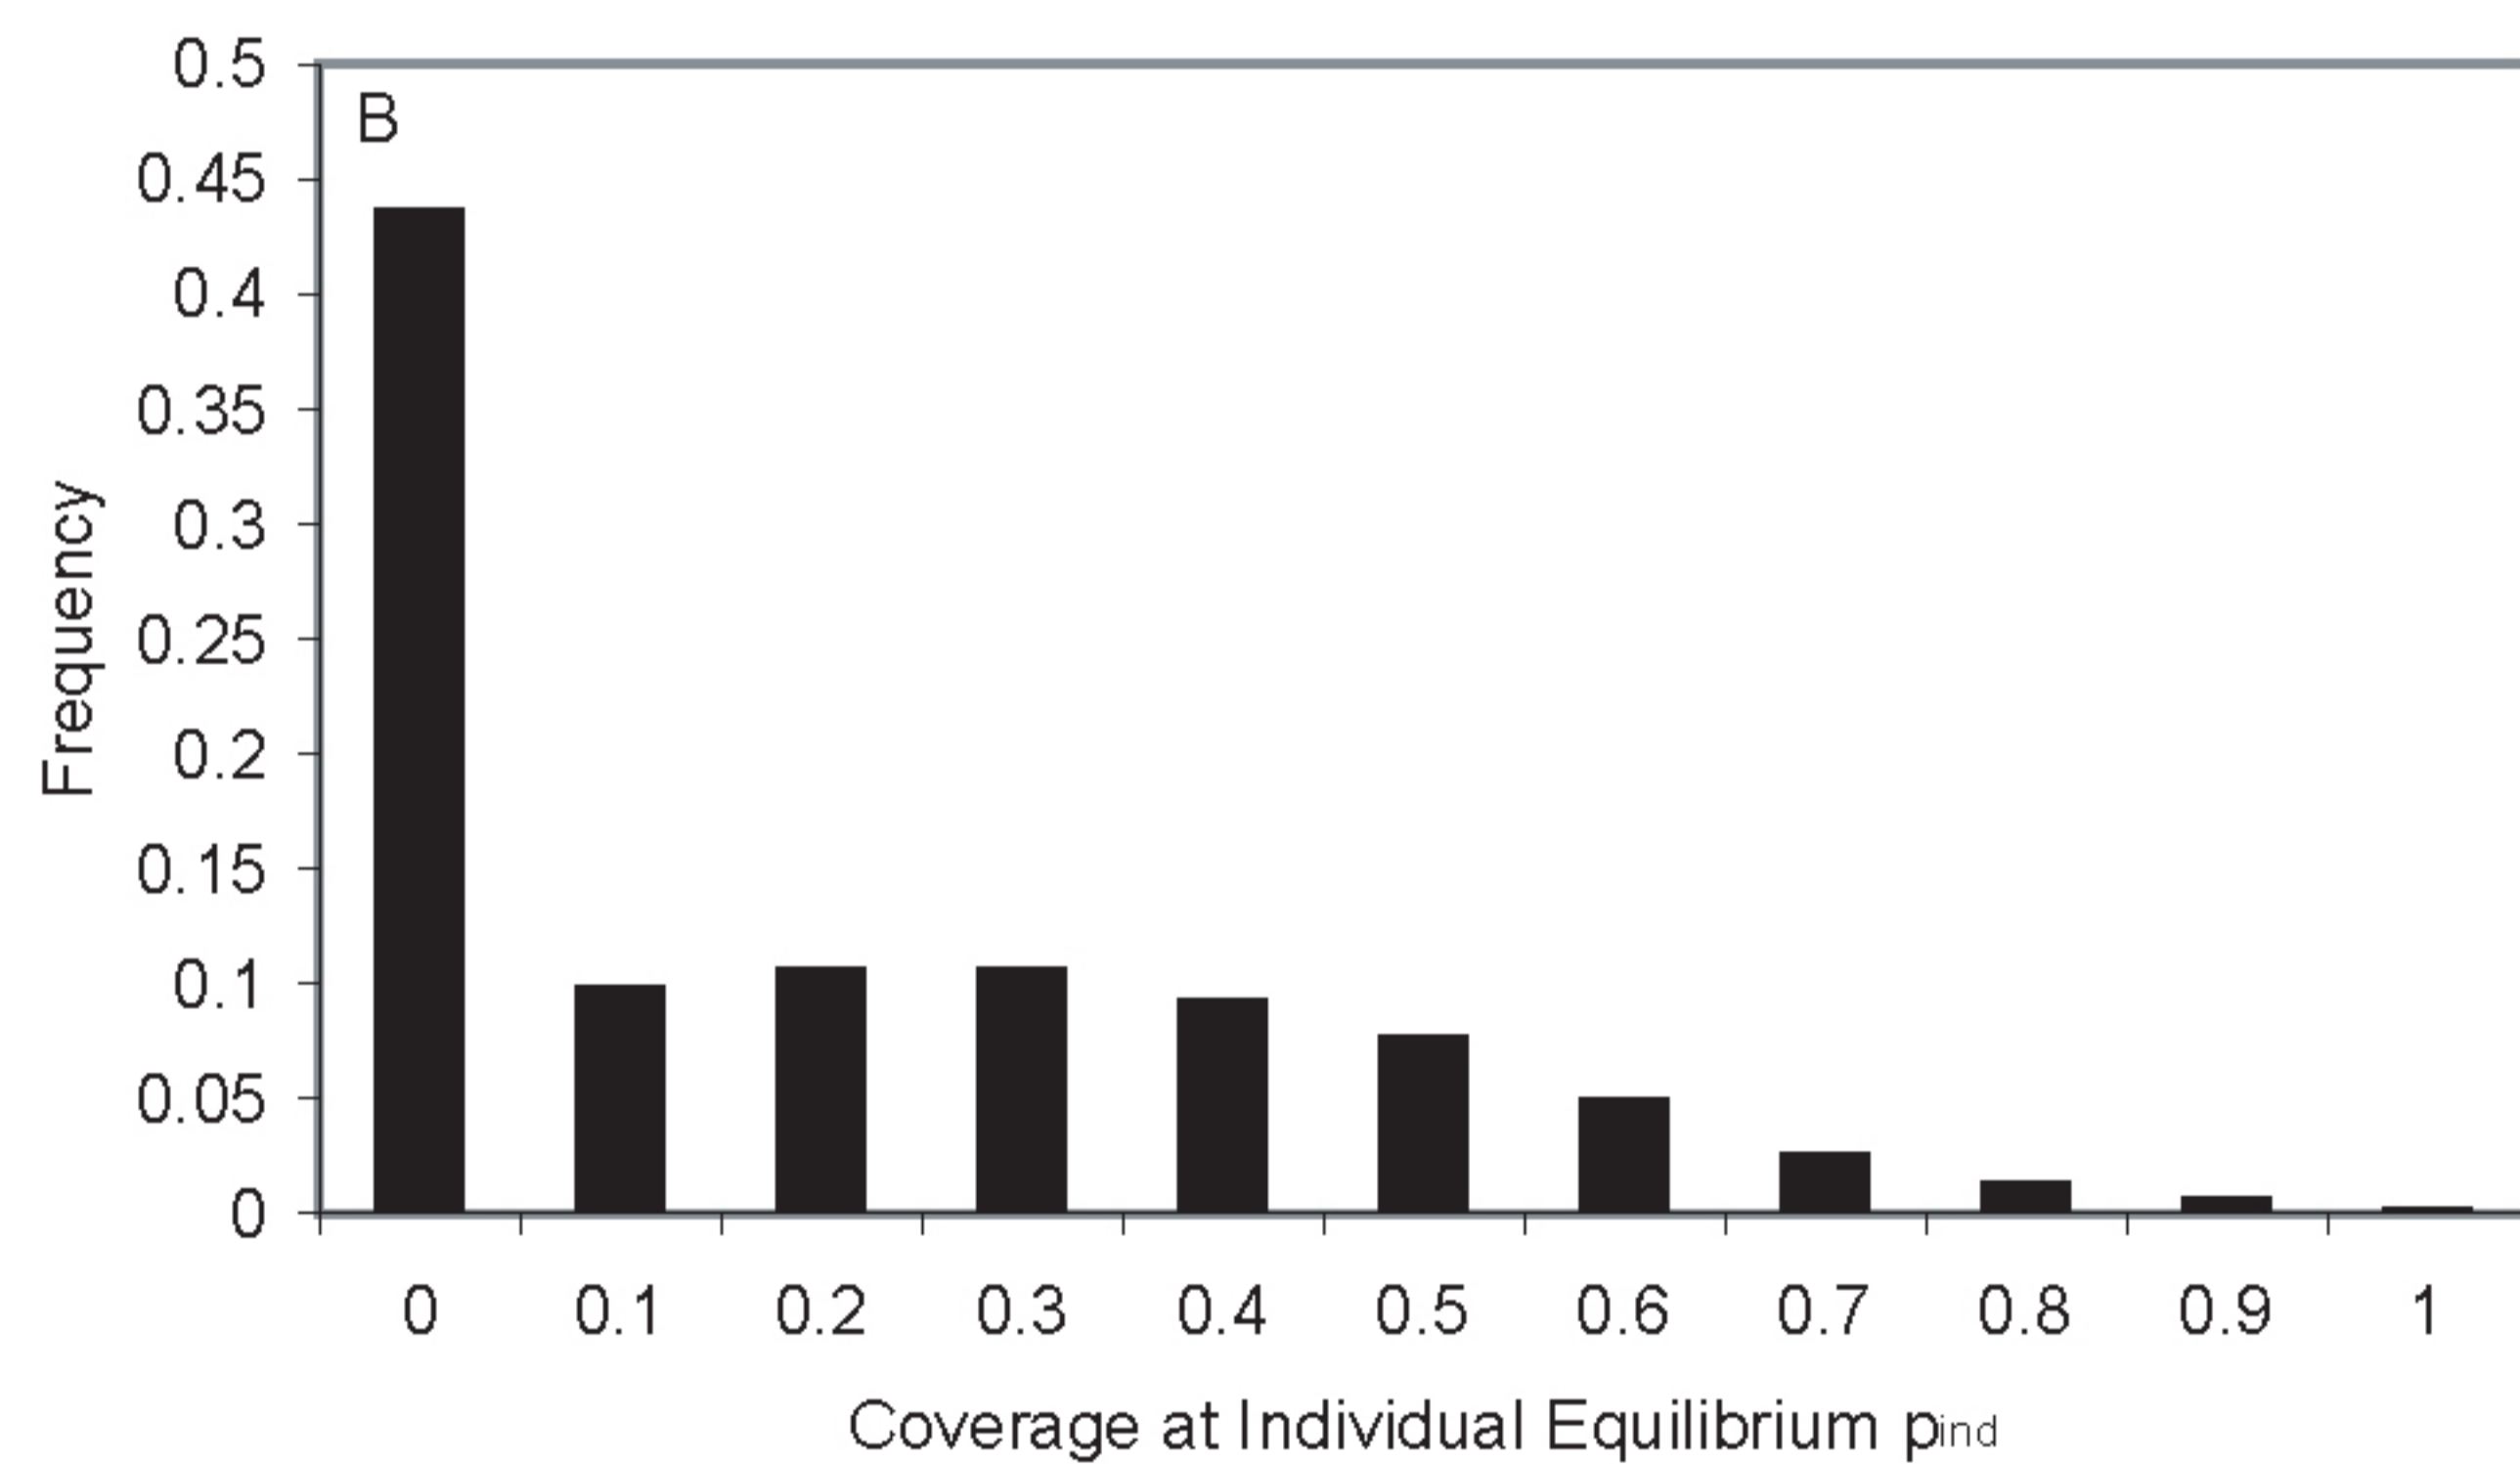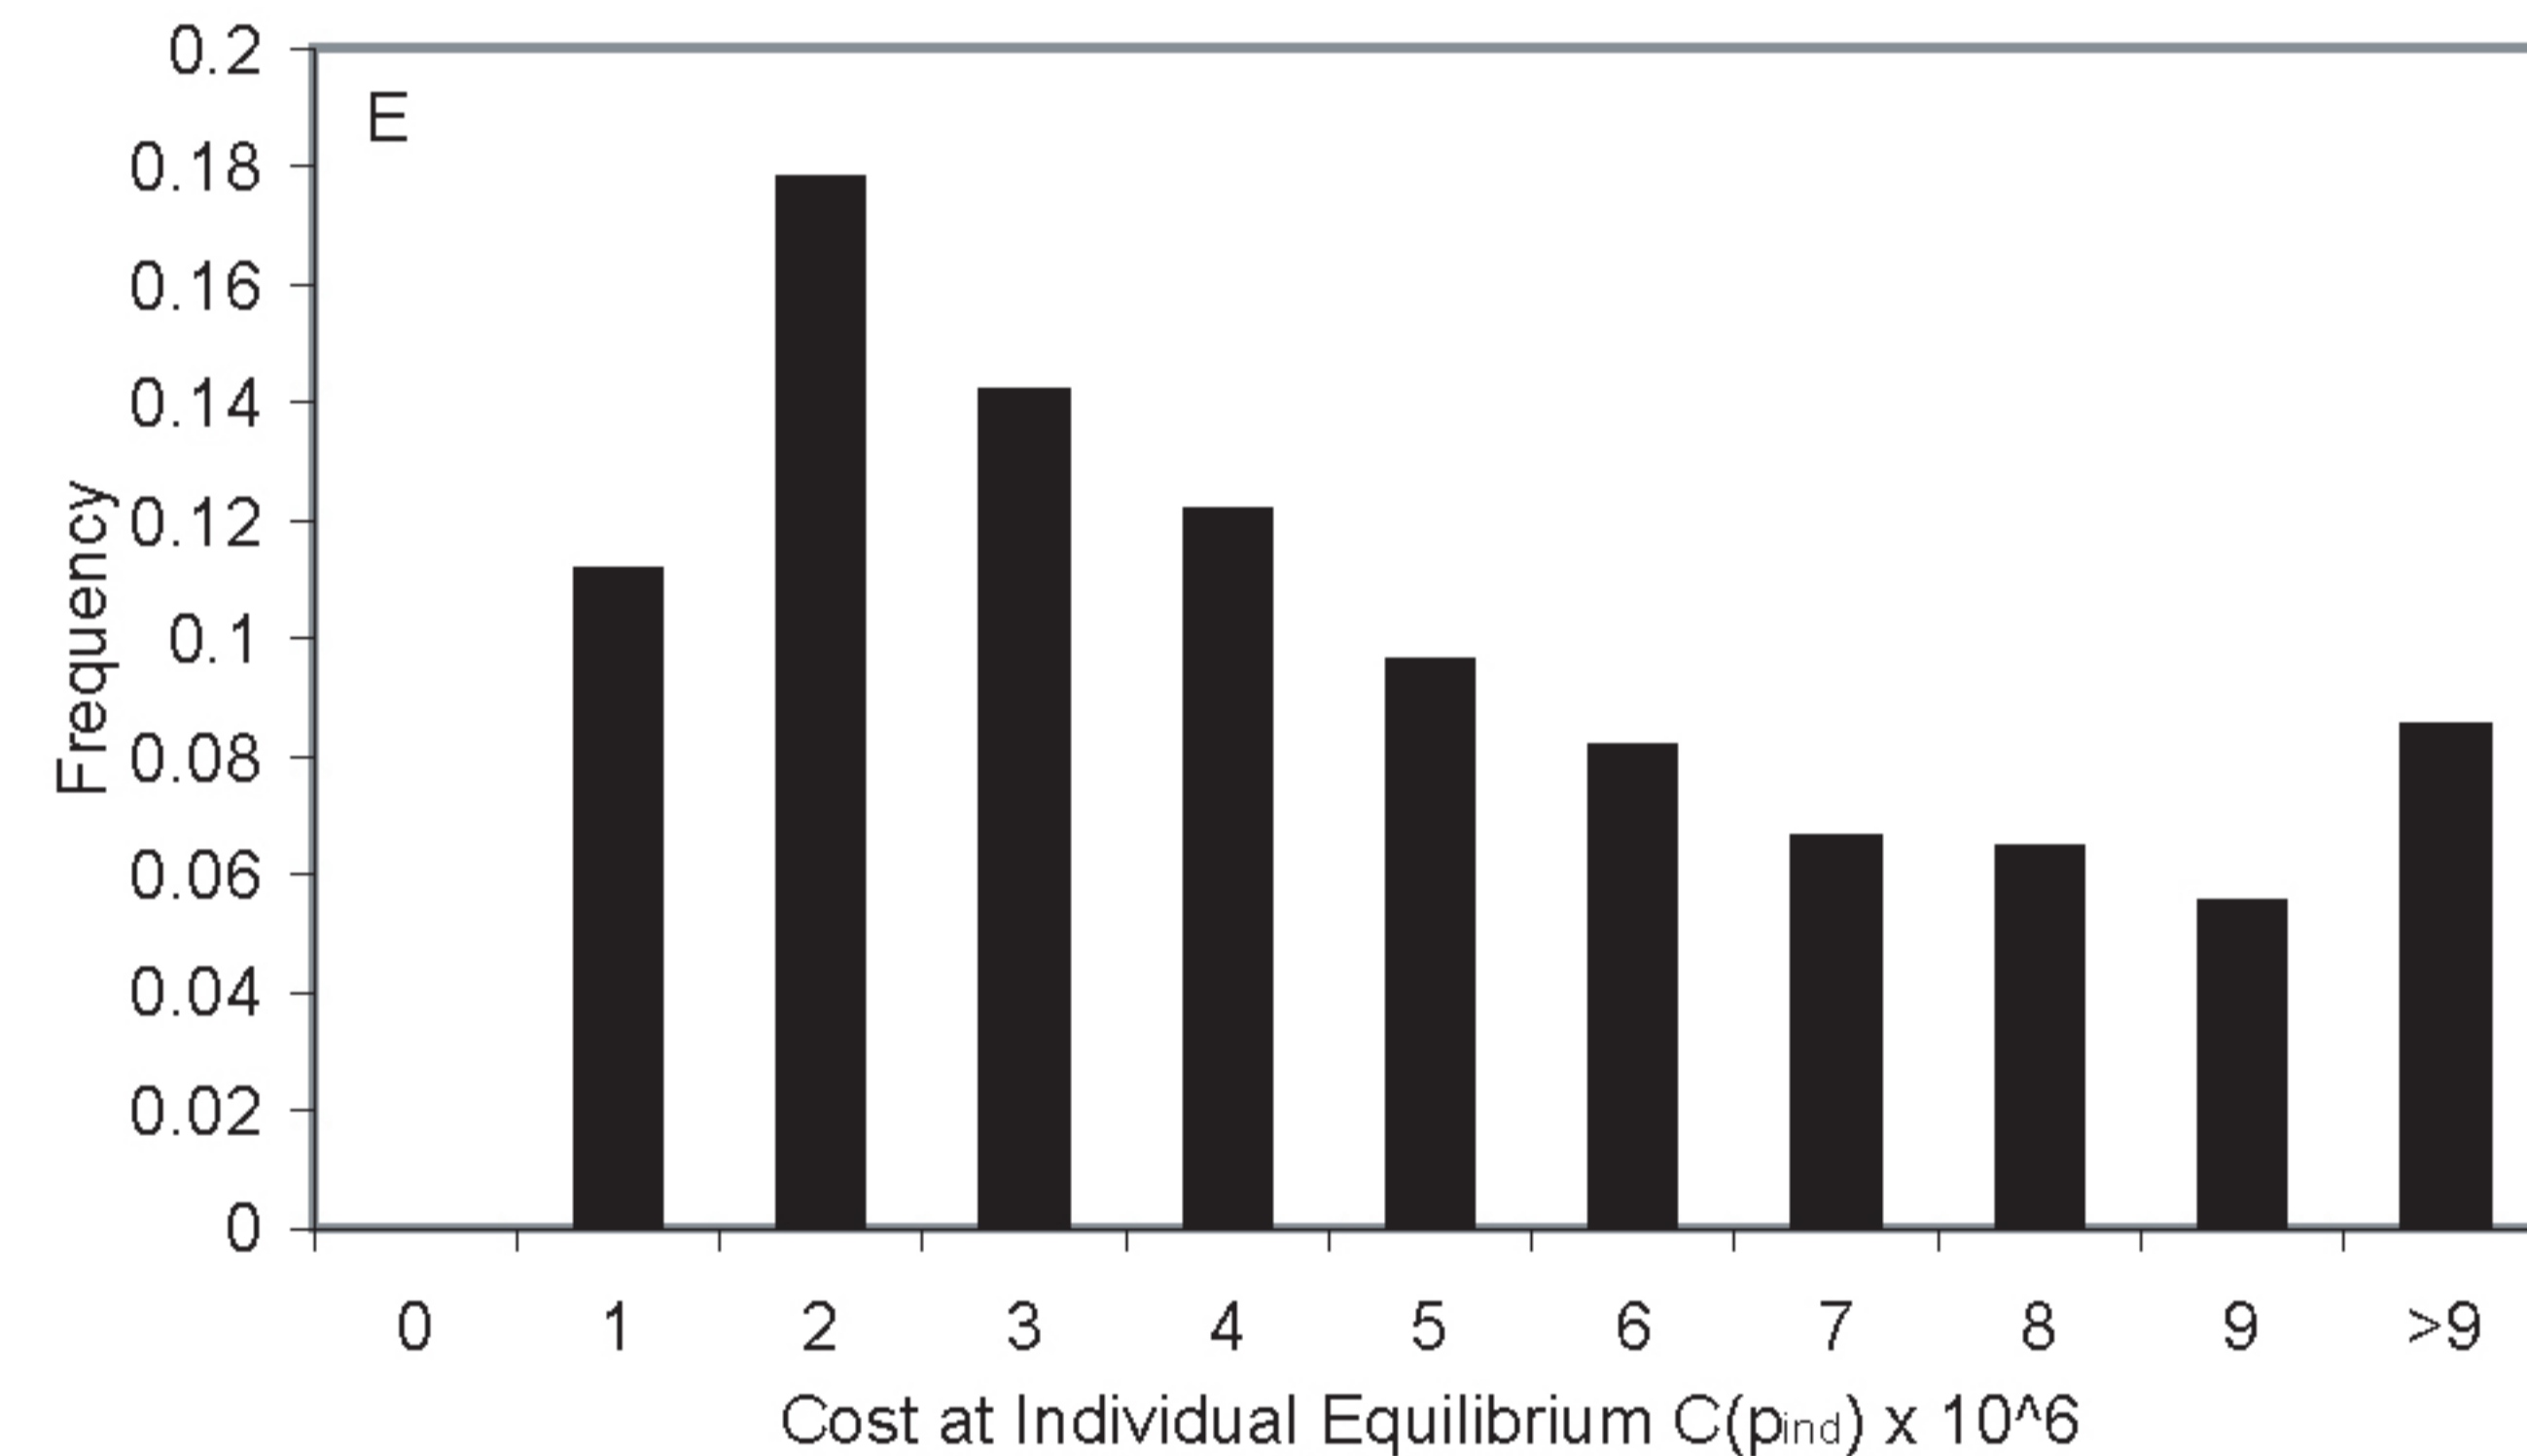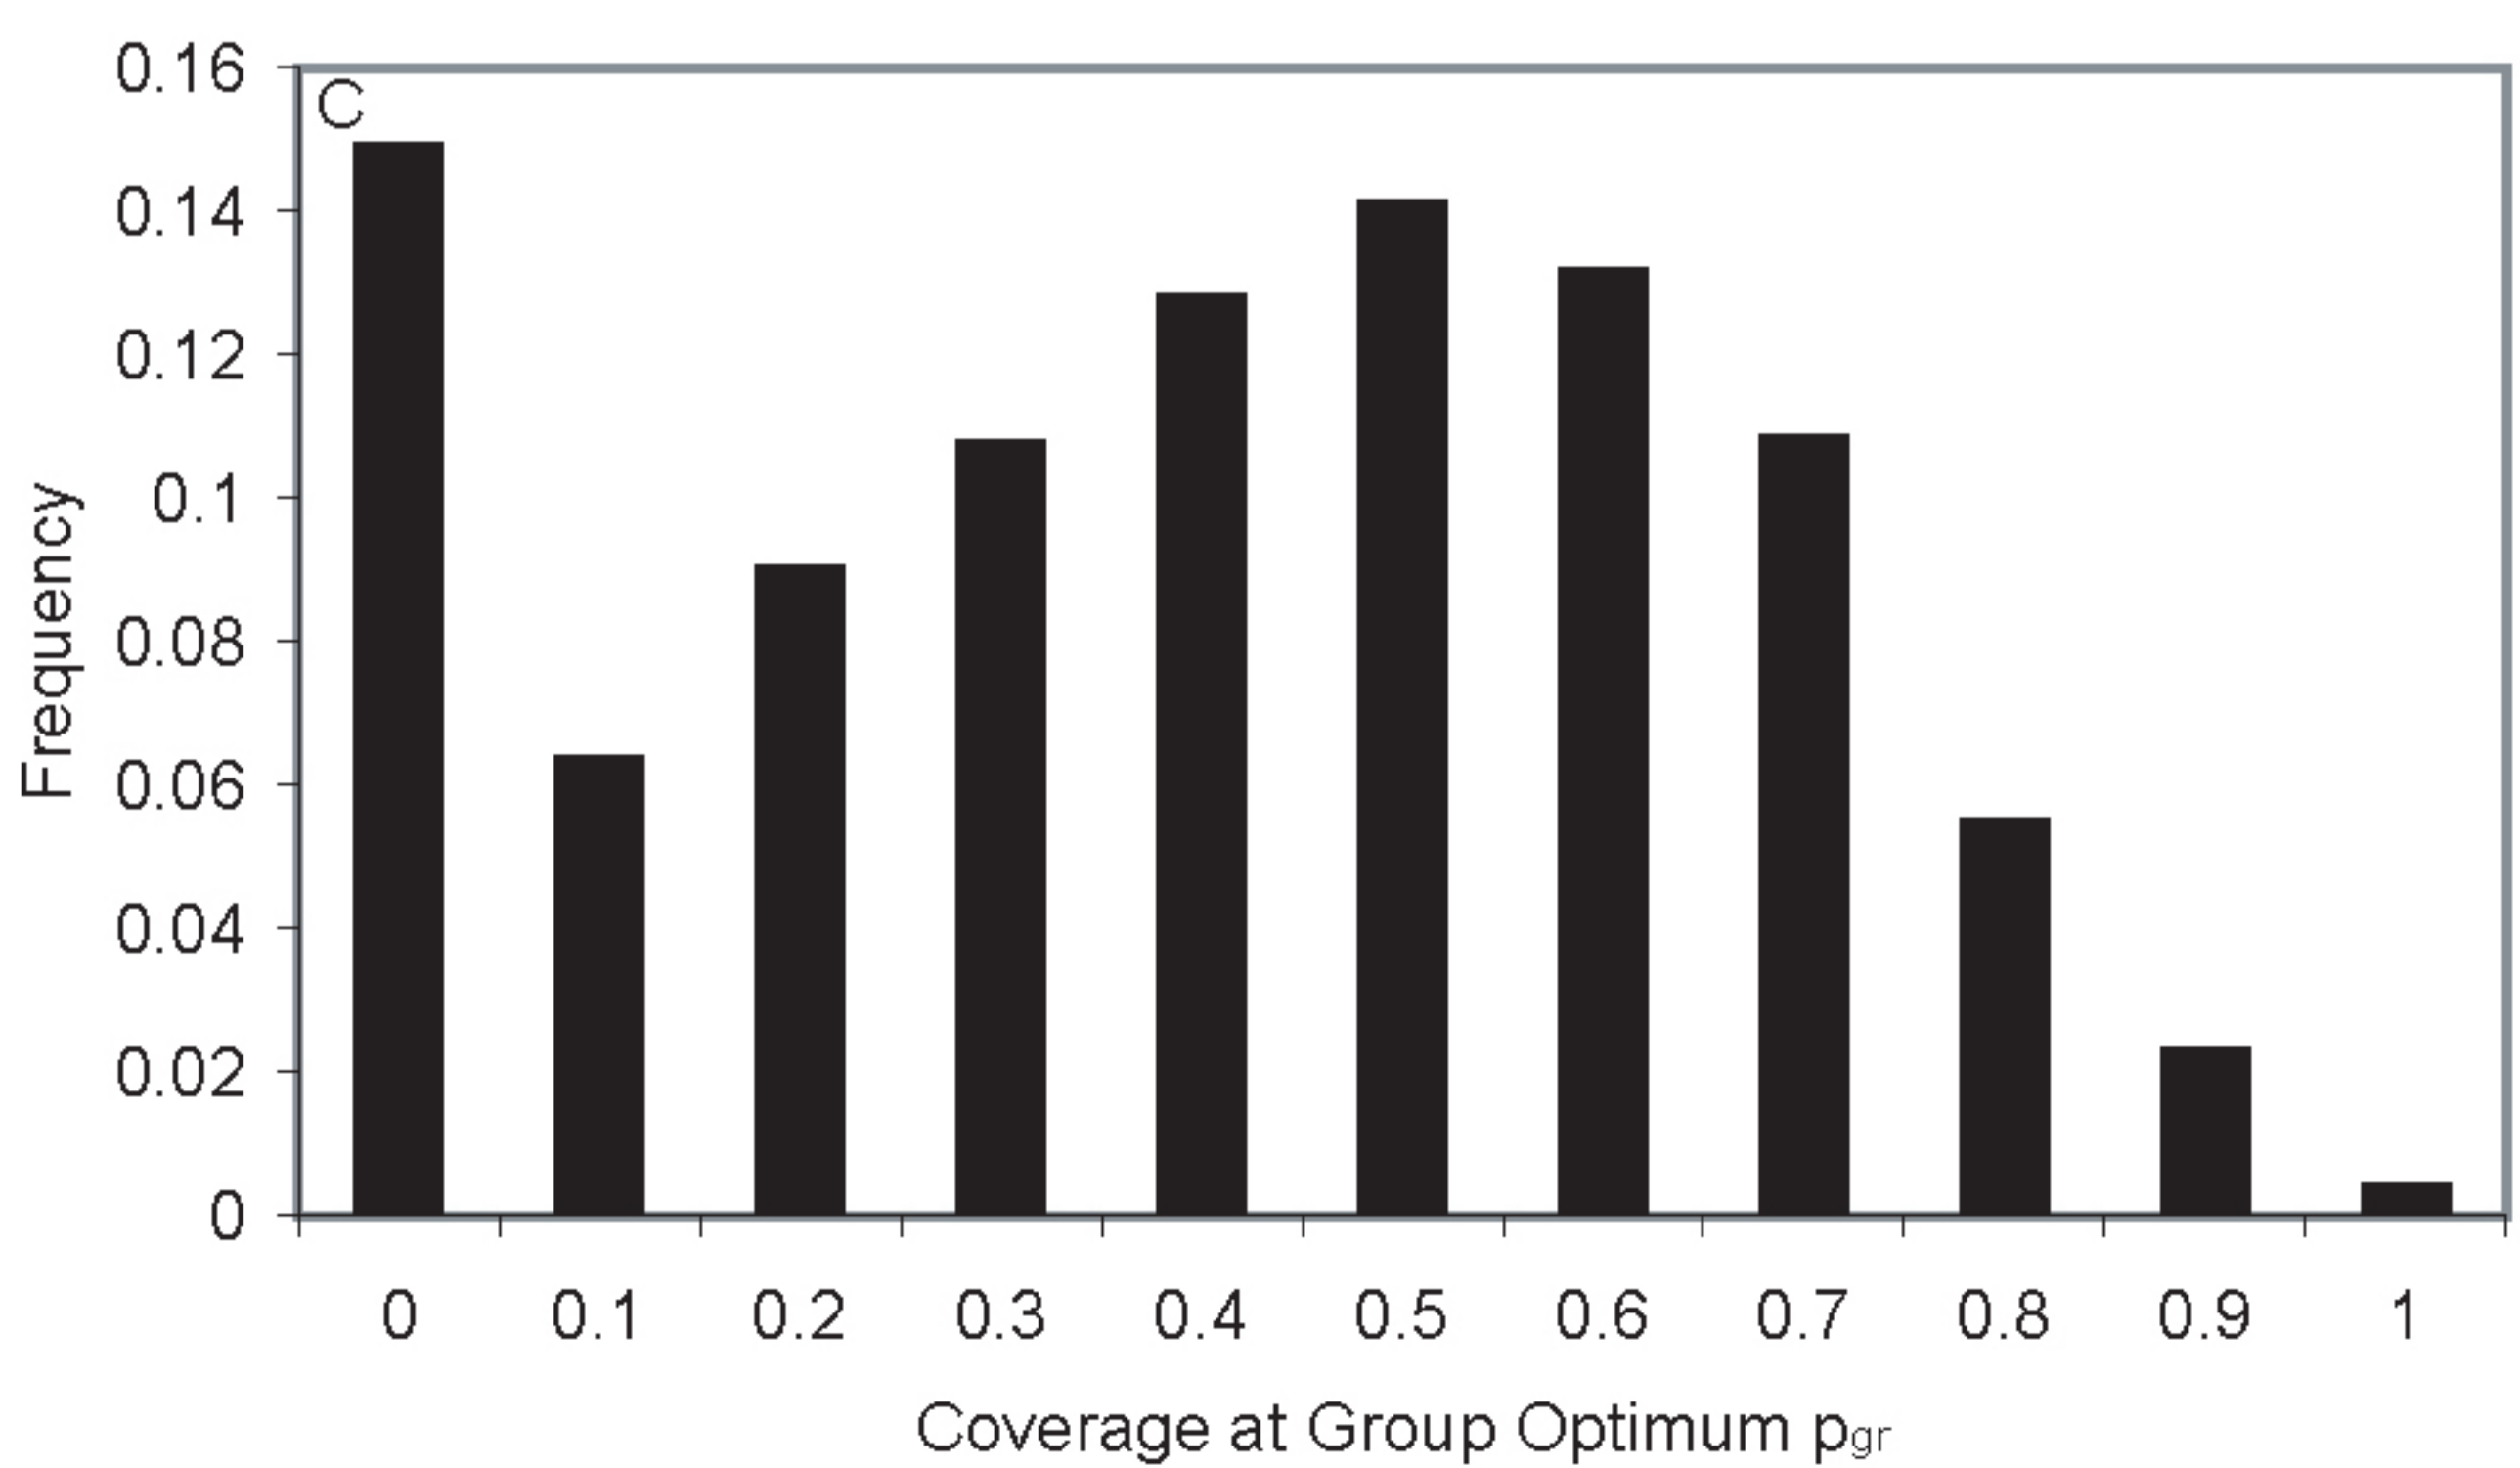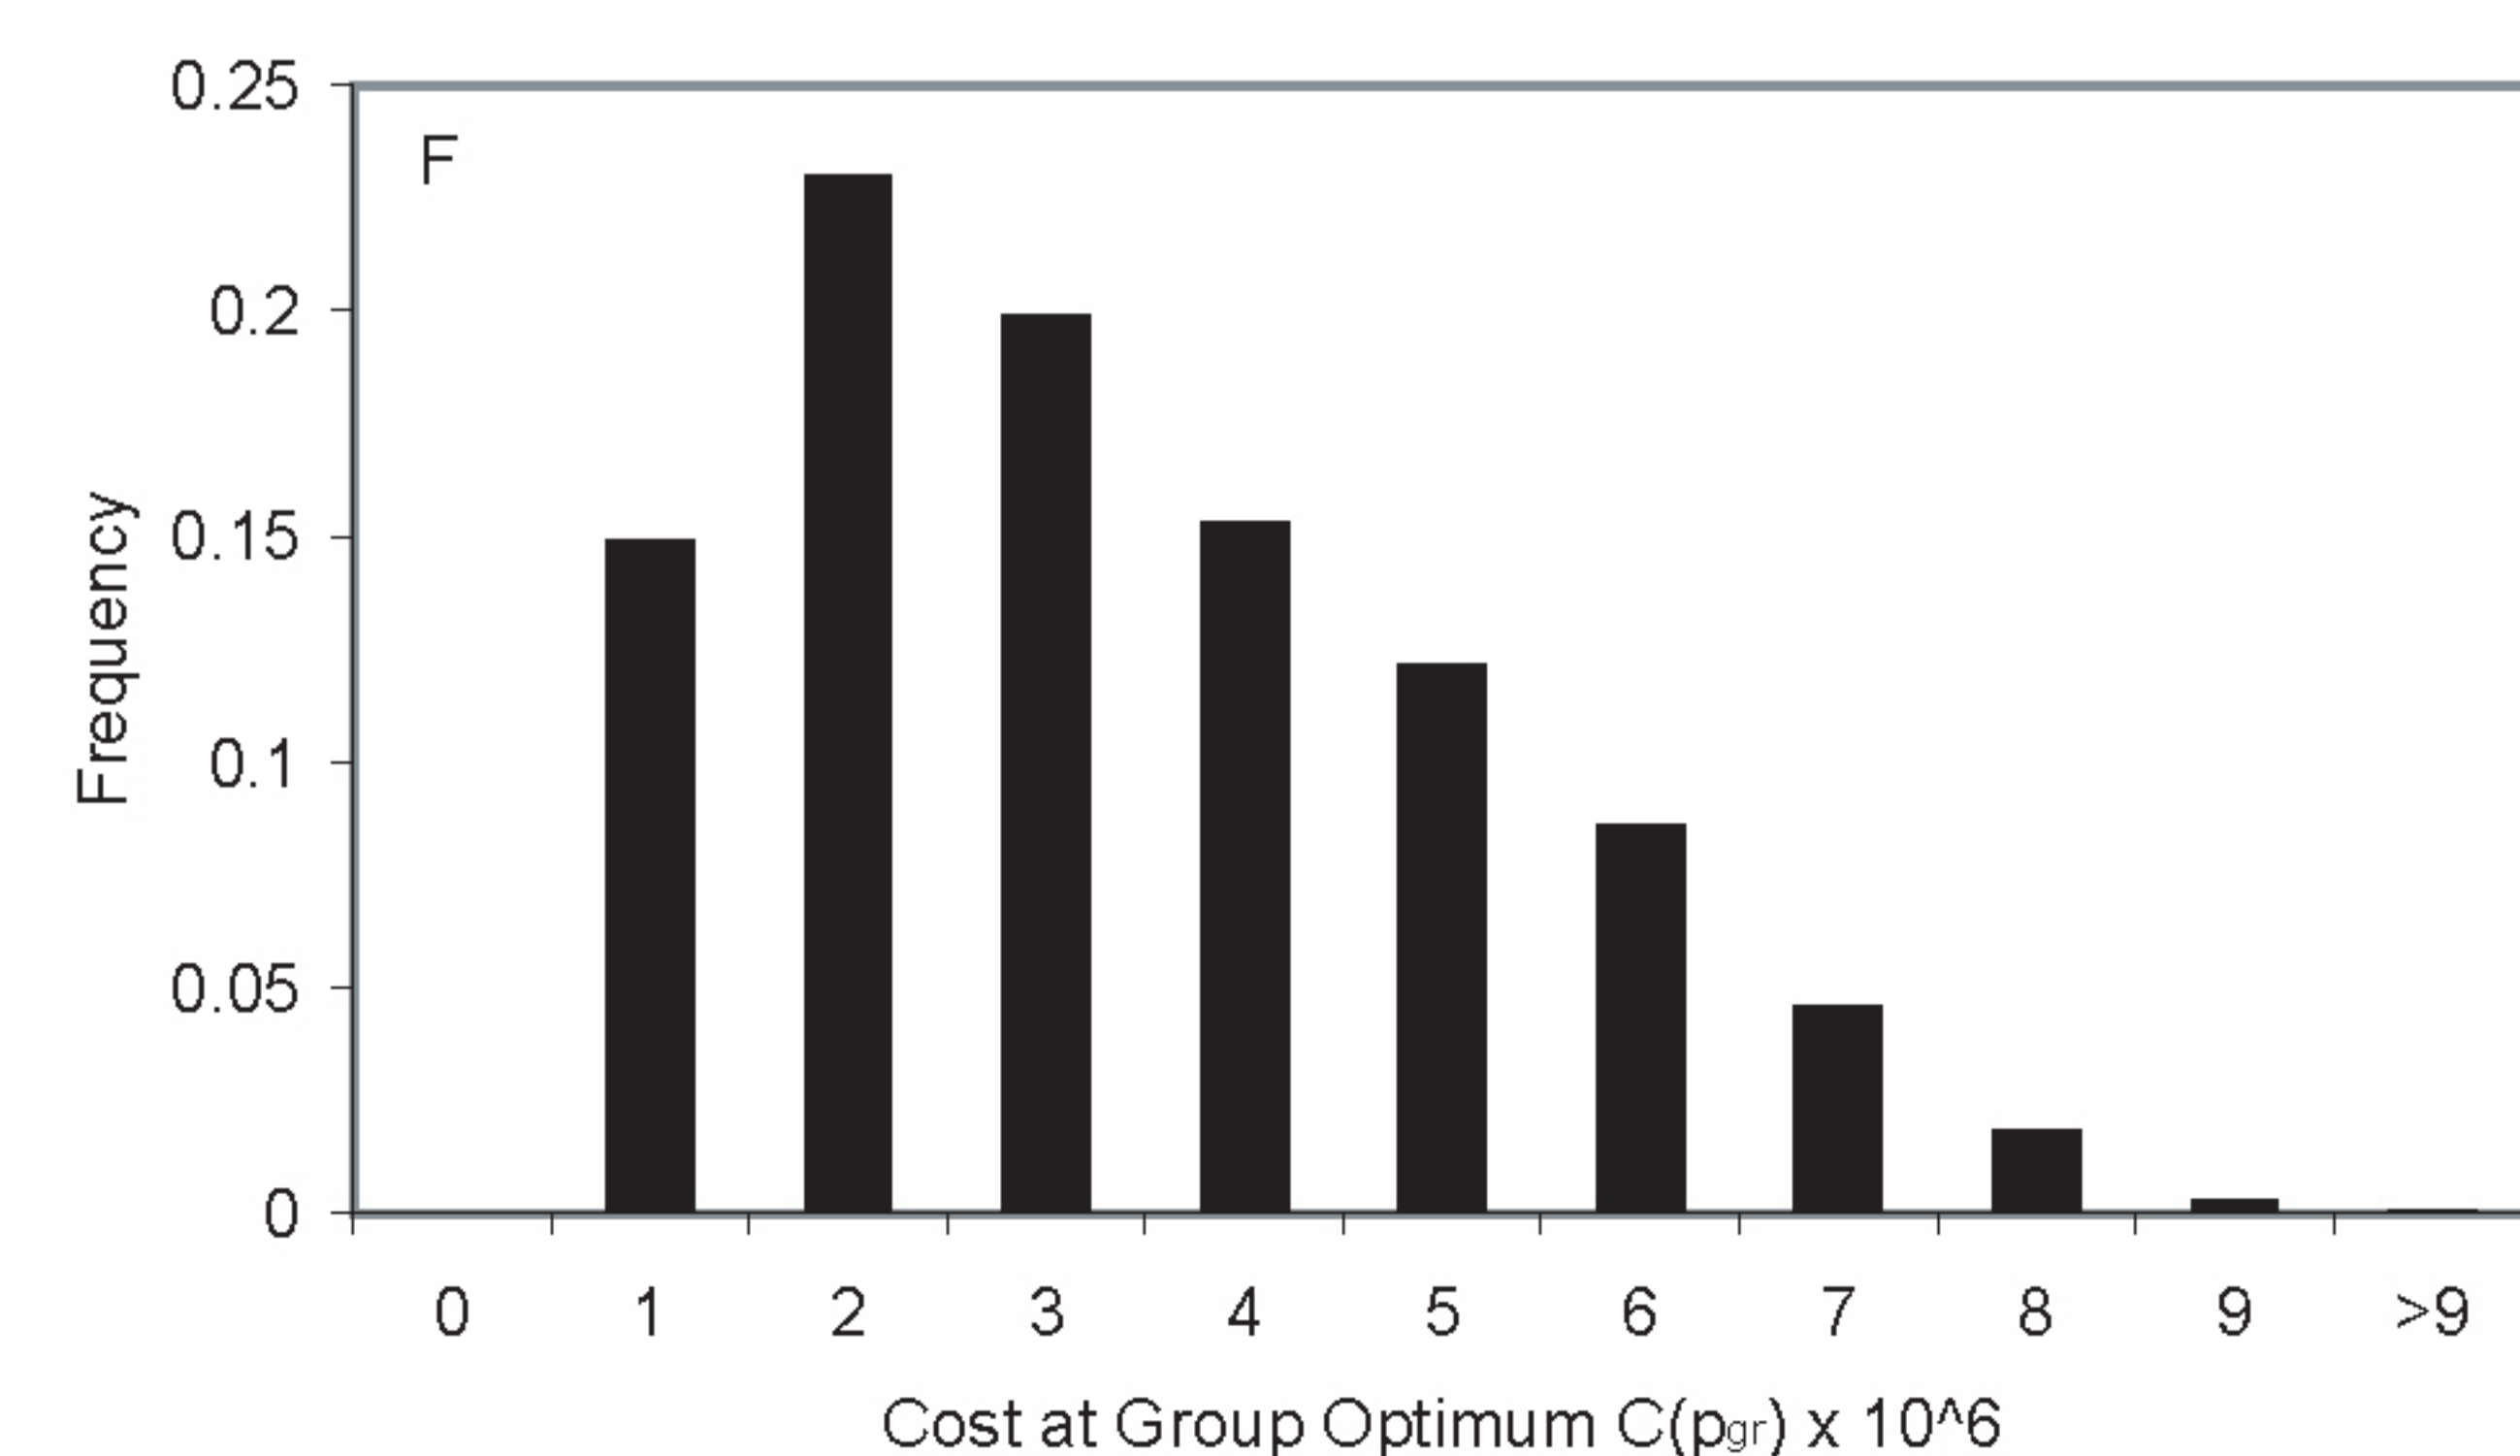

Supplement: pnas_1731324100_5.pdf [file pnas_1731324100_5.pdf]

**A**Difference in Coverage  $\Delta p$ 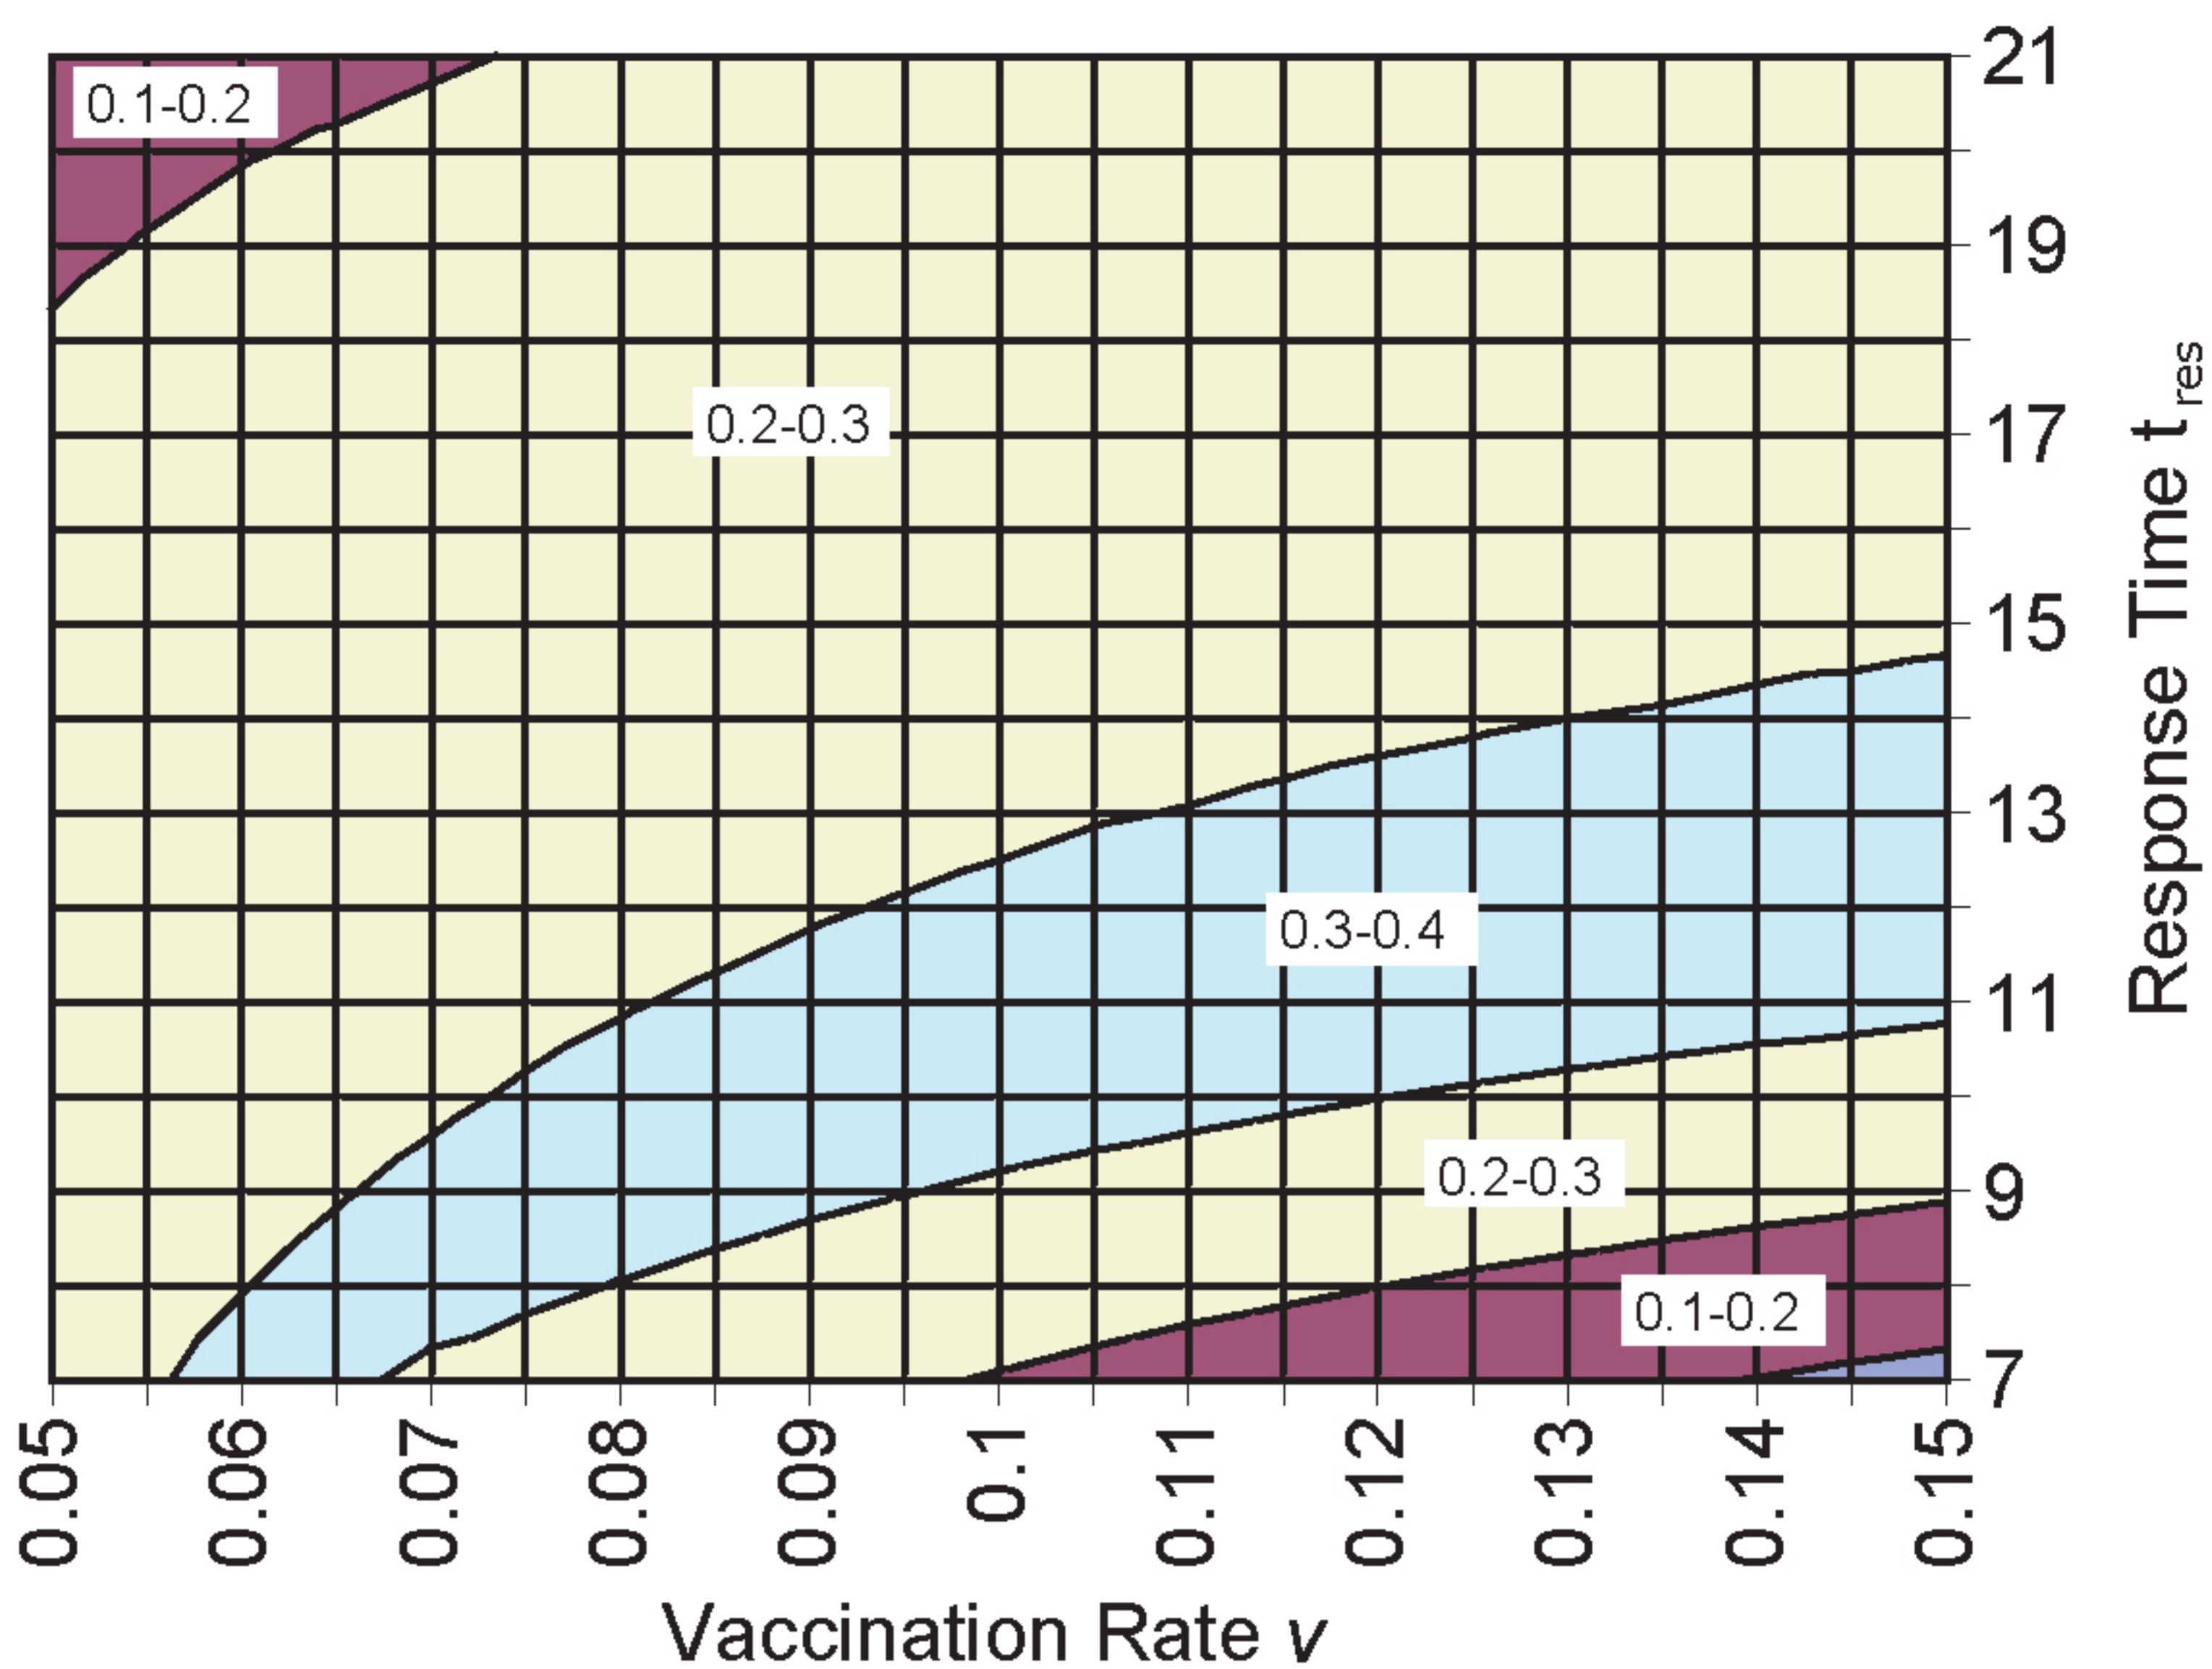**B**Increase in Mortality  $\Delta C/C$ 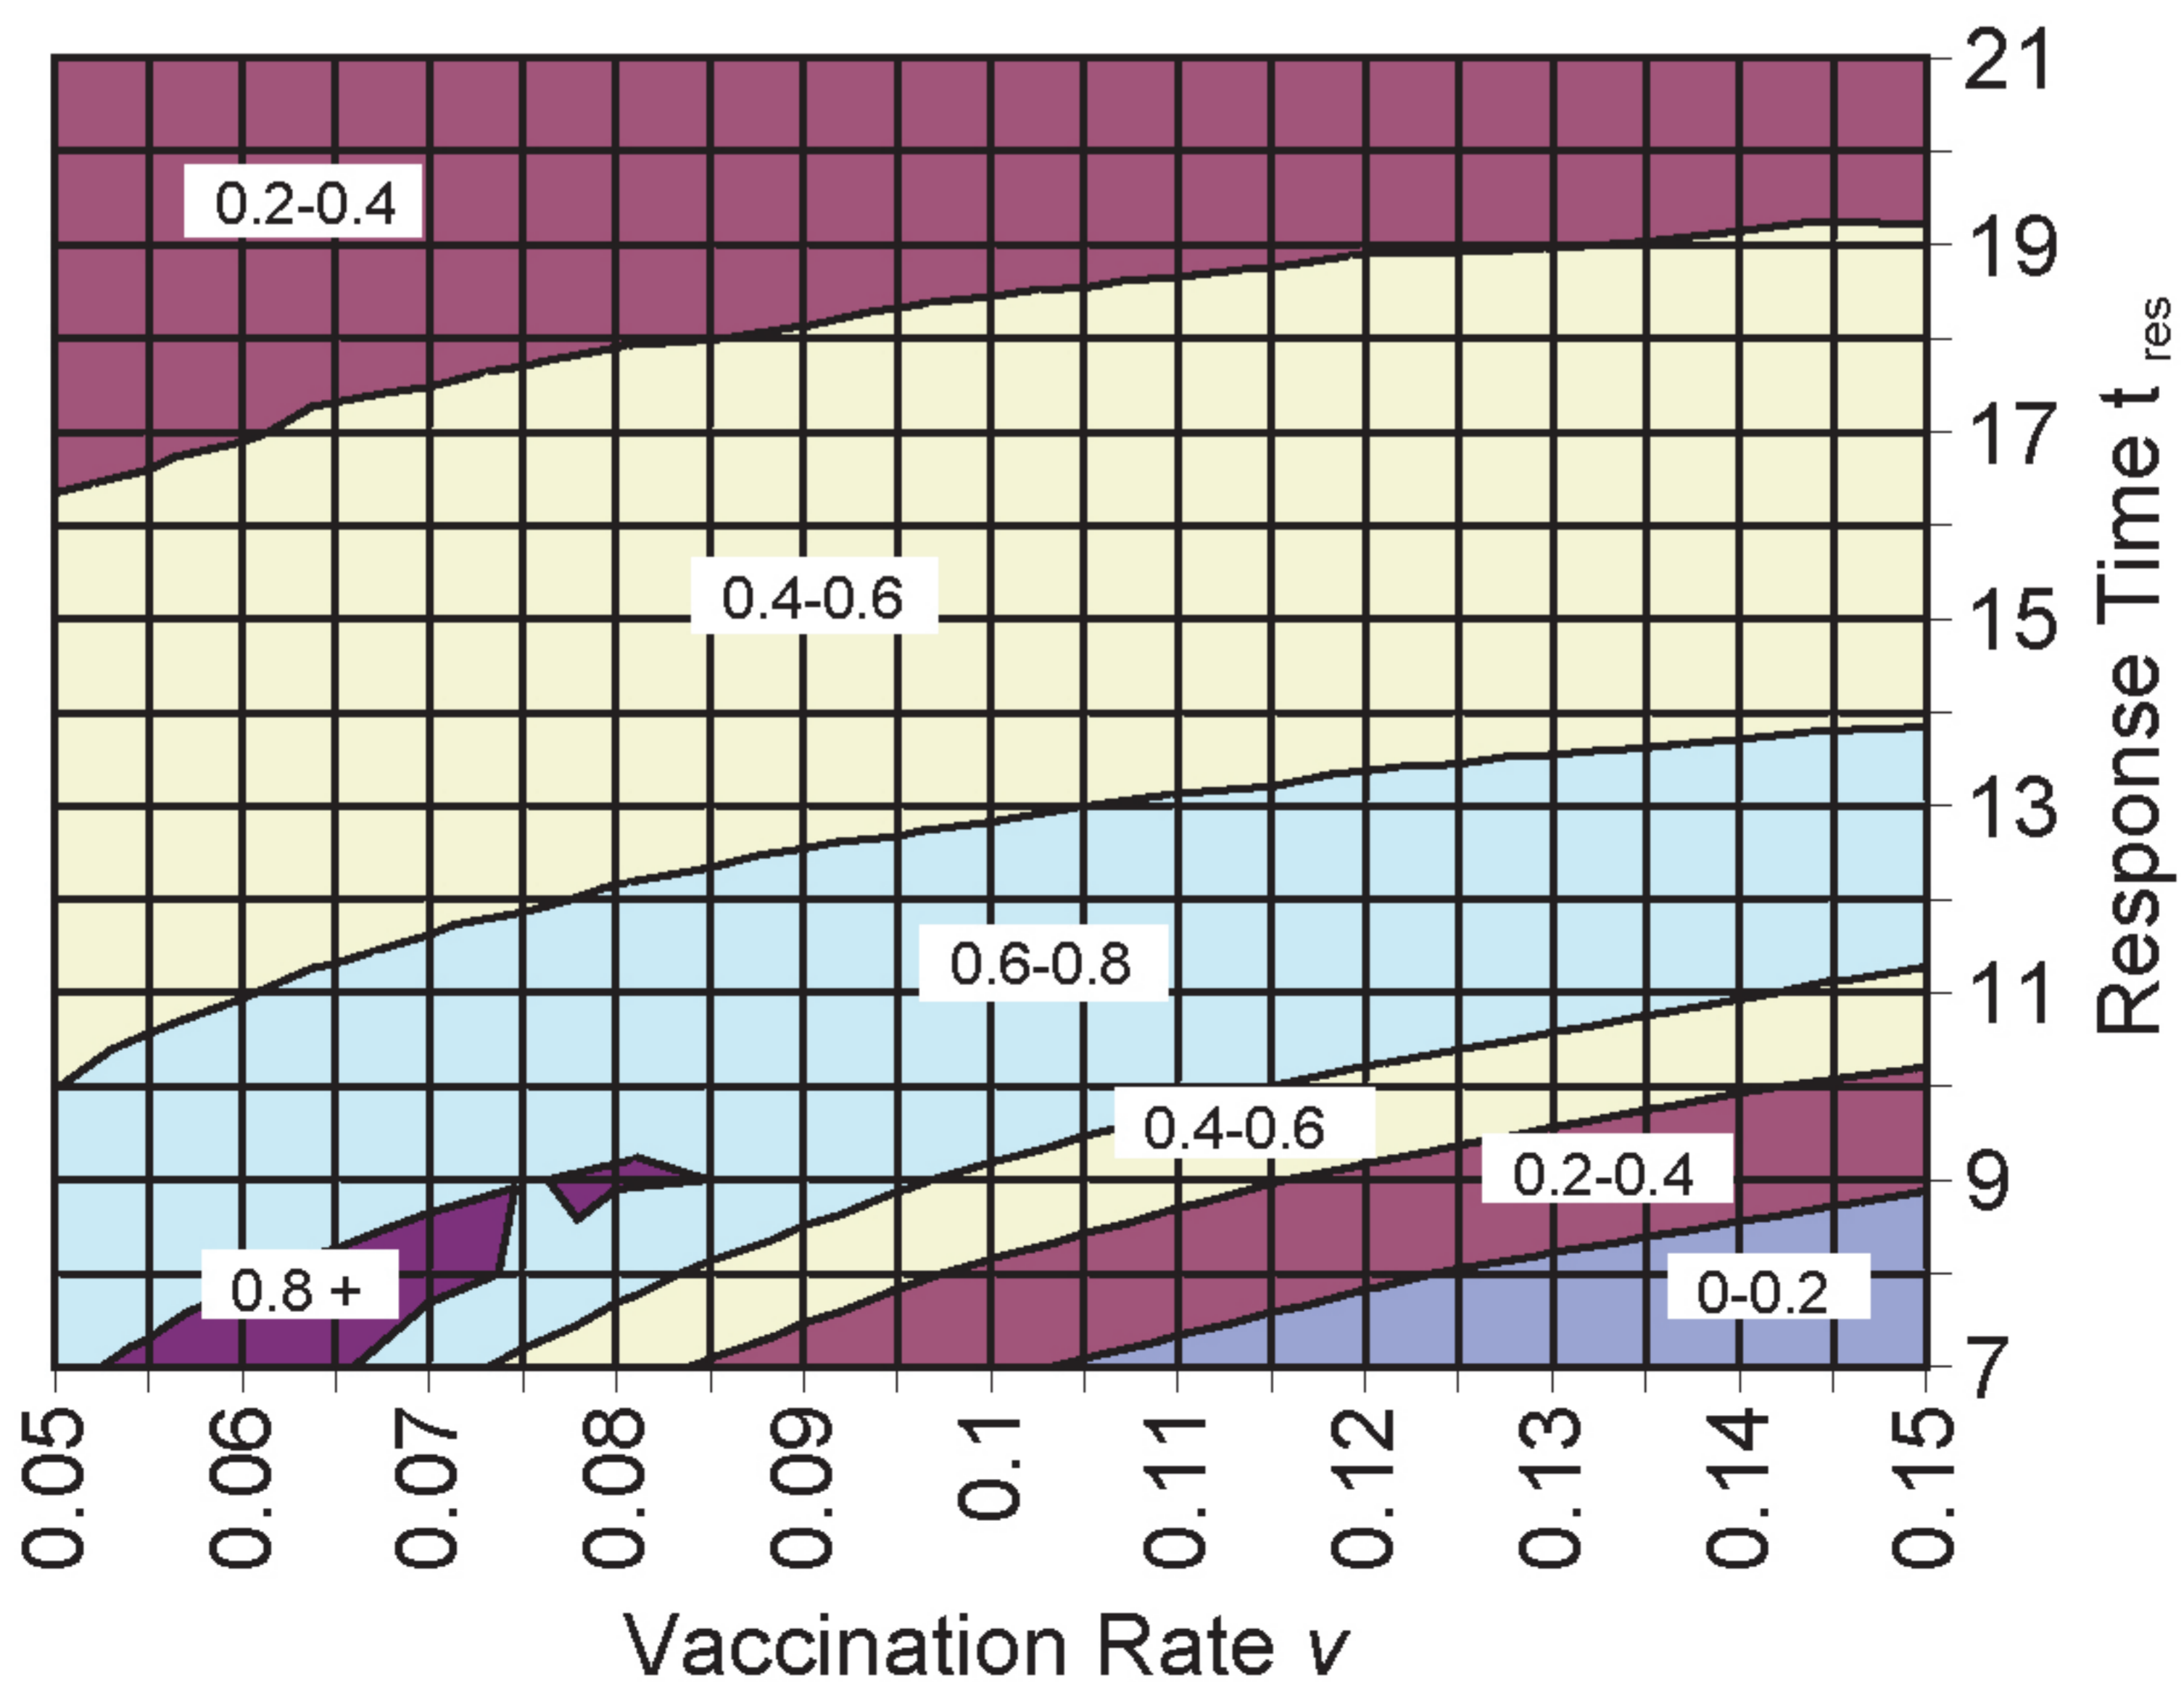

Supplement: pnas_1731324100_7.pdf [file pnas_1731324100_7.pdf]
